# Supplementary material
Source: Royal Society of Chemistry journal article supplement (doi:10.1039/d6an00162a)
Supplement: d6an00162a1.pdf [file d6an00162a1.pdf]

## Supporting Information

### Structure-aware fragment assignment for interpreting tandem mass spectrometry of modified and cyclic peptides

Erckes, V.; Misiek, A; Streuli, A.; Steuer, C.\*

ETH Zurich, Institute of Pharmaceutical Sciences, Laboratory of Pharmaceutical Analytics, Zurich,  
Switzerland

\* Corresponding author: [christian.steuer@pharma.ethz.ch](mailto:christian.steuer@pharma.ethz.ch)

#### ORCID

VE: <https://orcid.org/0000-0002-9650-4160>

AS: <https://orcid.org/0000-0002-0025-8023>

CS: <https://orcid.org/0000-0002-6102-3367>

#### Table of Contents

|                              |    |
|------------------------------|----|
| S1 Peptide Synthesis .....   | 2  |
| S2 RPLC-MS/MS data .....     | 3  |
| S3 Assigned MS/MS data ..... | 14 |
| S4 Additional figures .....  | 23 |
| S5 References .....          | 36 |

## S1 Peptide synthesis

### Chemicals

All Fmoc and side chain protected amino acid building blocks, preloaded Wang resin (0.57 mmol/g) and 2-(6-Chloro-1H-benzotriazole-1-yl)-1,1,3,3-tetramethylaminium hexafluorophosphate (HCTU) were purchased from Gyros Protein Technologies (Uppsala, Sweden). Dimethylformamide (DMF; EMPLURA Supelco) and diethyl ether (Emsure Supelco, Ph. Eur.) were purchased from Merck (Darmstadt, Germany). Pyrrolidine (99+%) and N-methylmorpholine (NMM; 99+%) were purchased from Thermo Scientific (MA, USA). Trifluoroacetic acid (TFA; 99.5%) was purchased from Apollo Scientific (Stockport, UK). Triisopropylsilane (TIS) was purchased from Tokyo Chemical Industry (Tokyo, Japan). N,N-diisopropylethylamine (DIPEA) was purchased from Carl Roth (Karlsruhe, Germany). Dichloromethane (DCM; >99.8%) and formic acid (FA; 98.0-100%) were purchased from Sigma Aldrich (Buchs, Switzerland). Nanopure water was used from an in-house ELGA Purelab purification system (VWS, Villmergen, Switzerland).

### Peptide synthesis

Peptide synthesis of linear peptides was conducted on a PurePep Chorus peptide synthesizer (Gyros Protein Technologies, Uppsala, Sweden). Wang resin with a loading equivalent to 0.1-0.2 mmol (1 eq.) was swollen in 3 mL DMF at room temperature for 15 min. Fmoc deprotection was conducted twice with 2.5 mL 20% (v/v) pyrrolidine in DMF for 5 min.<sup>1</sup> Protected amino acids (5 eq.) were activated with NMM (10 eq.) and HCTU (5 eq.) in 7 mL DMF.<sup>2</sup> The coupling reaction was performed for 10 min at 60 °C (except His 50 °C).<sup>3</sup> All steps were performed while shaking. After each deprotection and coupling step, the resin was rinsed 3 times with DMF. Deprotection and coupling cycles were repeated until the desired sequence was synthesized. The subsequent steps were conducted manually. Before cleavage, the resin was washed three times with DCM. Peptide cleavage from the resin and simultaneous removal of side chain protecting groups was performed in 3 mL of a mixture of TFA, TIS and H<sub>2</sub>O with a ratio of 95/2.5/2.5 (v/v) for 2 h at room temperature. The peptide was precipitated from the cleavage mixture by addition of ice-cold diethyl ether. The precipitate was washed and collected by centrifugation (10 min, 10'000 rpm, -10 °C).

S2 RPLC-MS/MS data

Angiotensin 1 (AT 1)

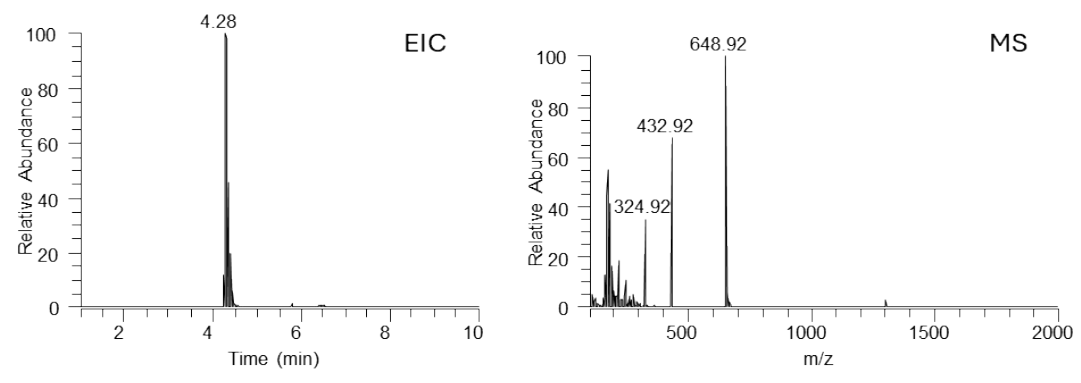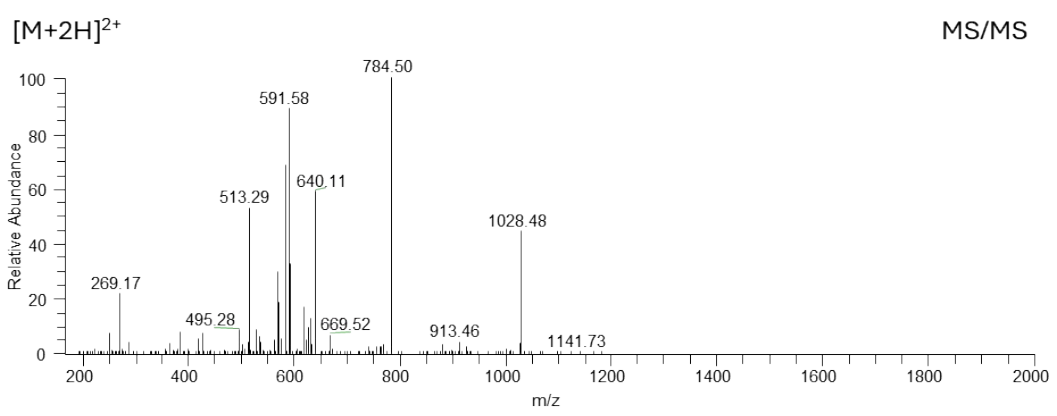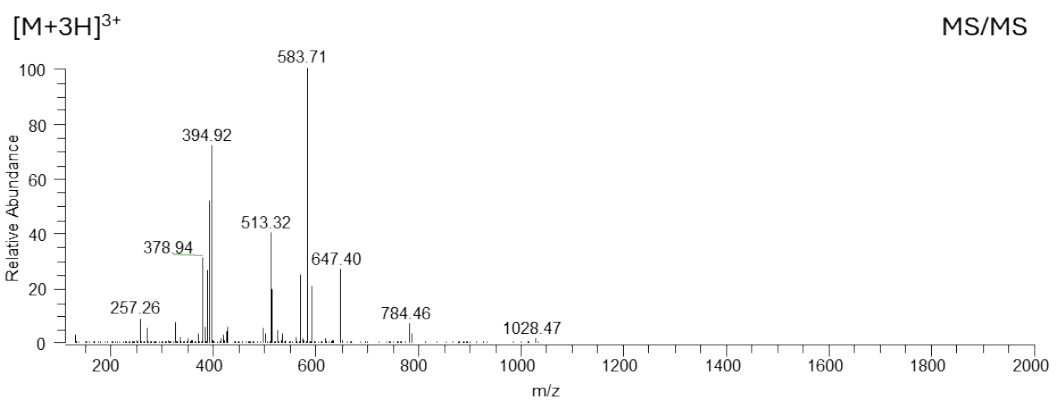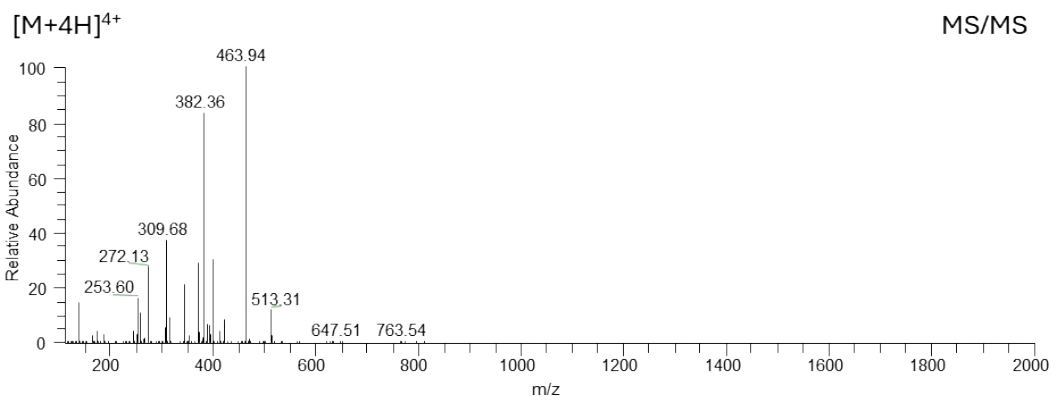

Figure S2-1: EIC, MS and MS/MS data AT1

## Angiotensin 2 (AT 2)

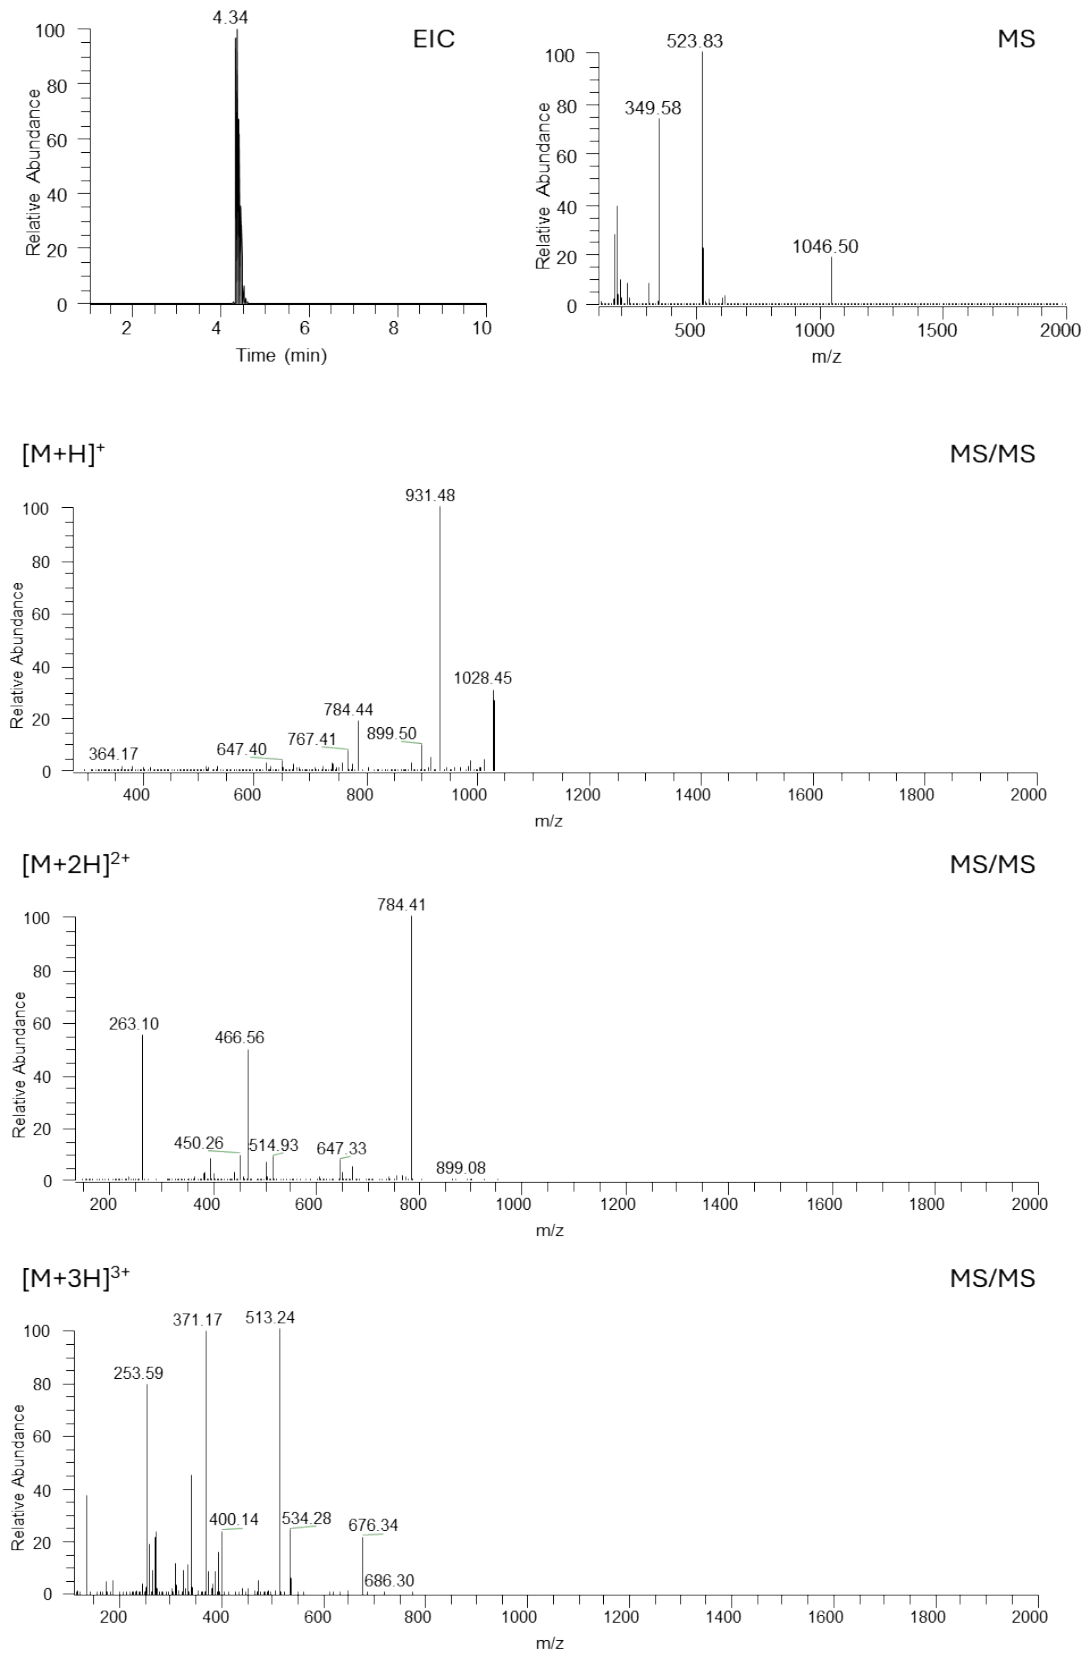

Figure S2-2: EIC, MS and MS/MS data AT2

### Angiotensin 3 (AT 3)

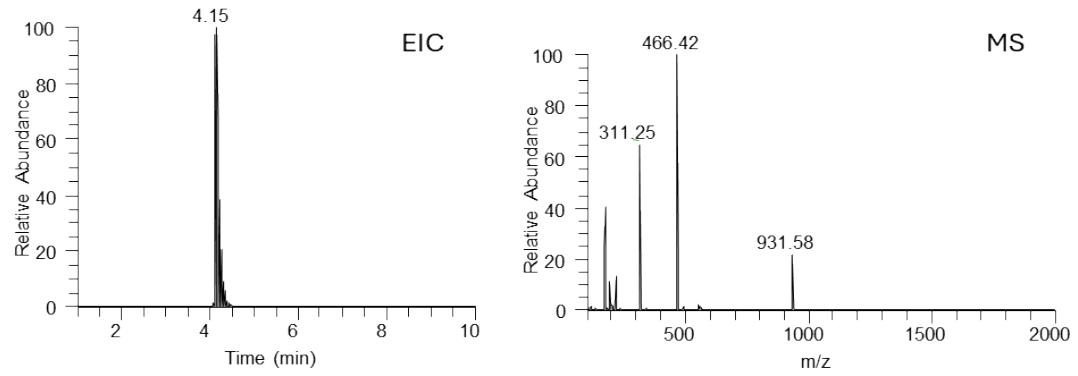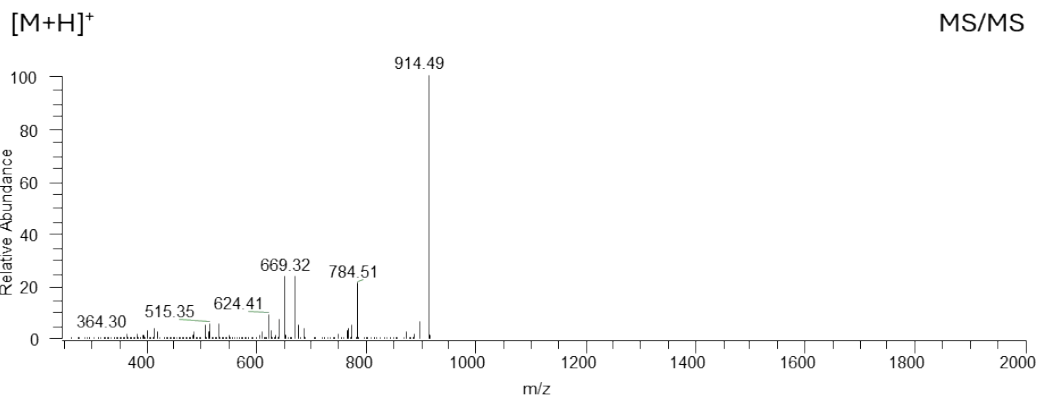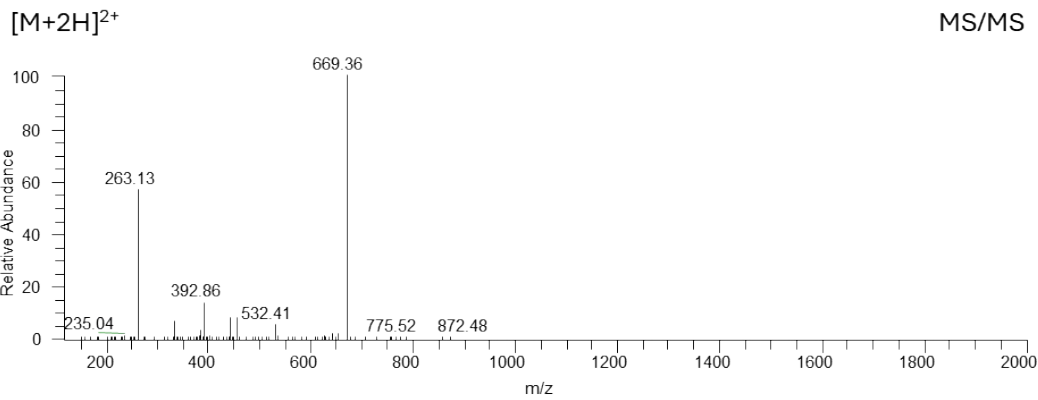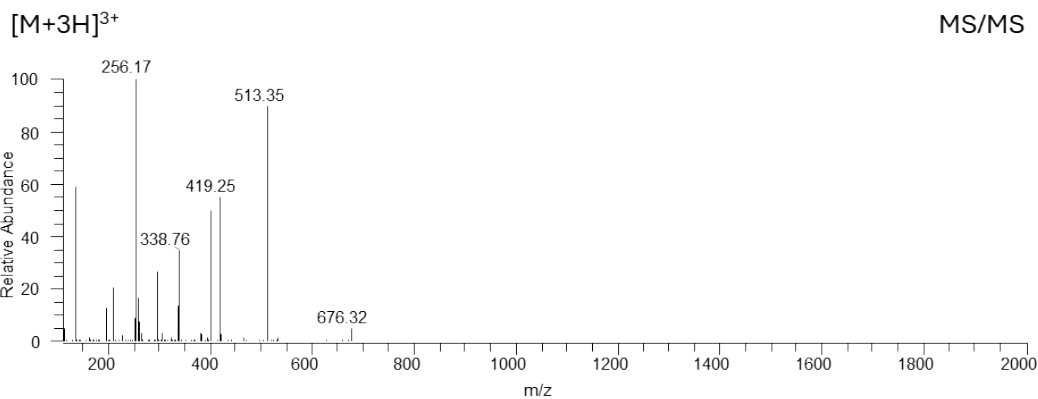

Figure S2-3: EIC, MS and MS/MS data AT3

# Angiotensin 4 (AT 4)

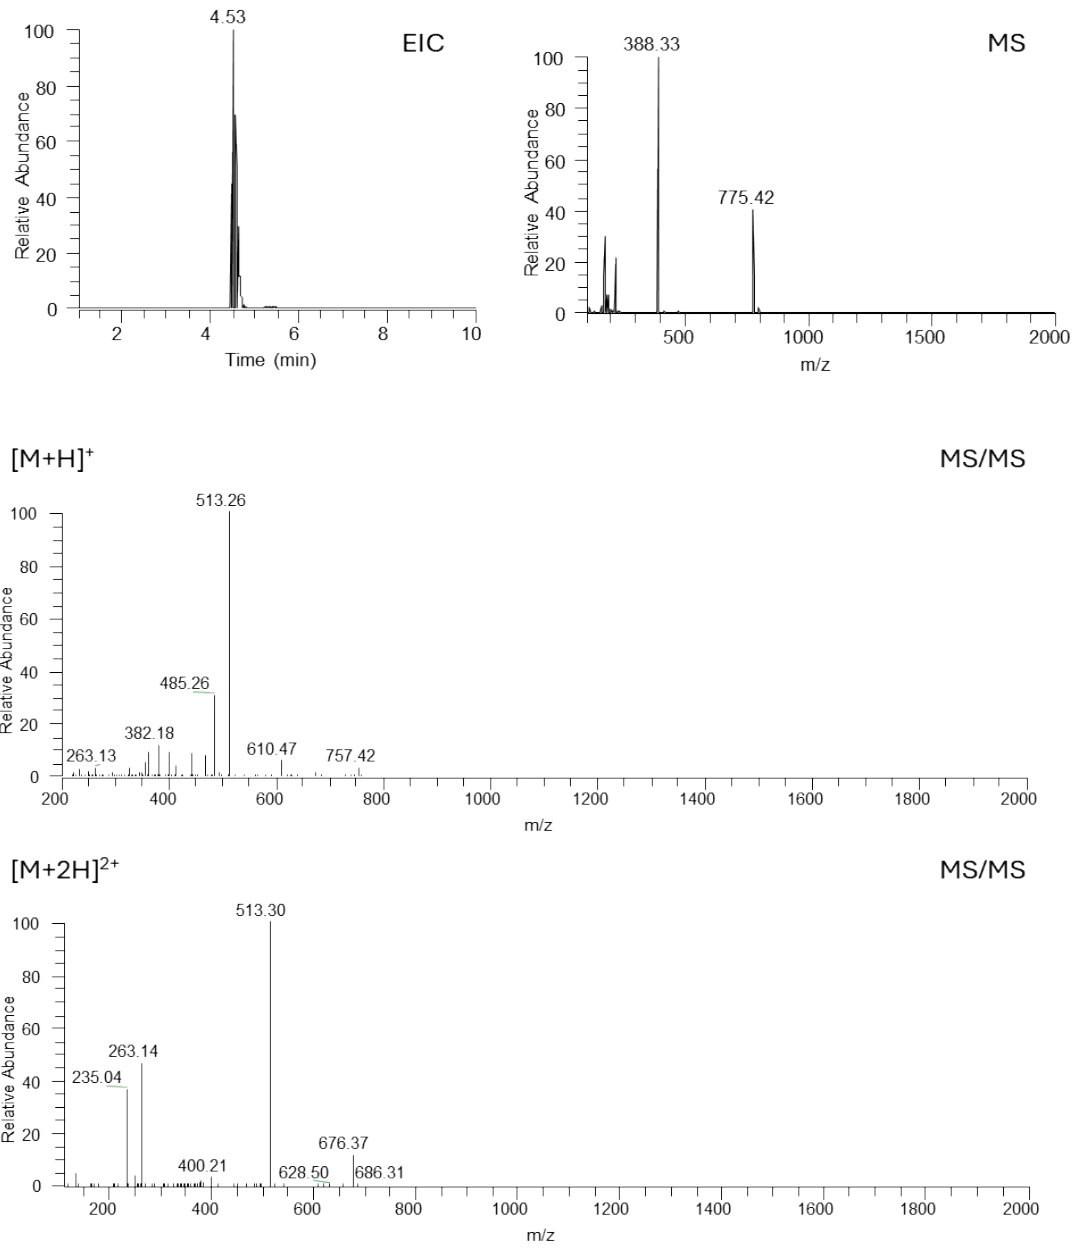

Figure S2-4: EIC, MS and MS/MS data AT4

# Liraglutide (LGL)

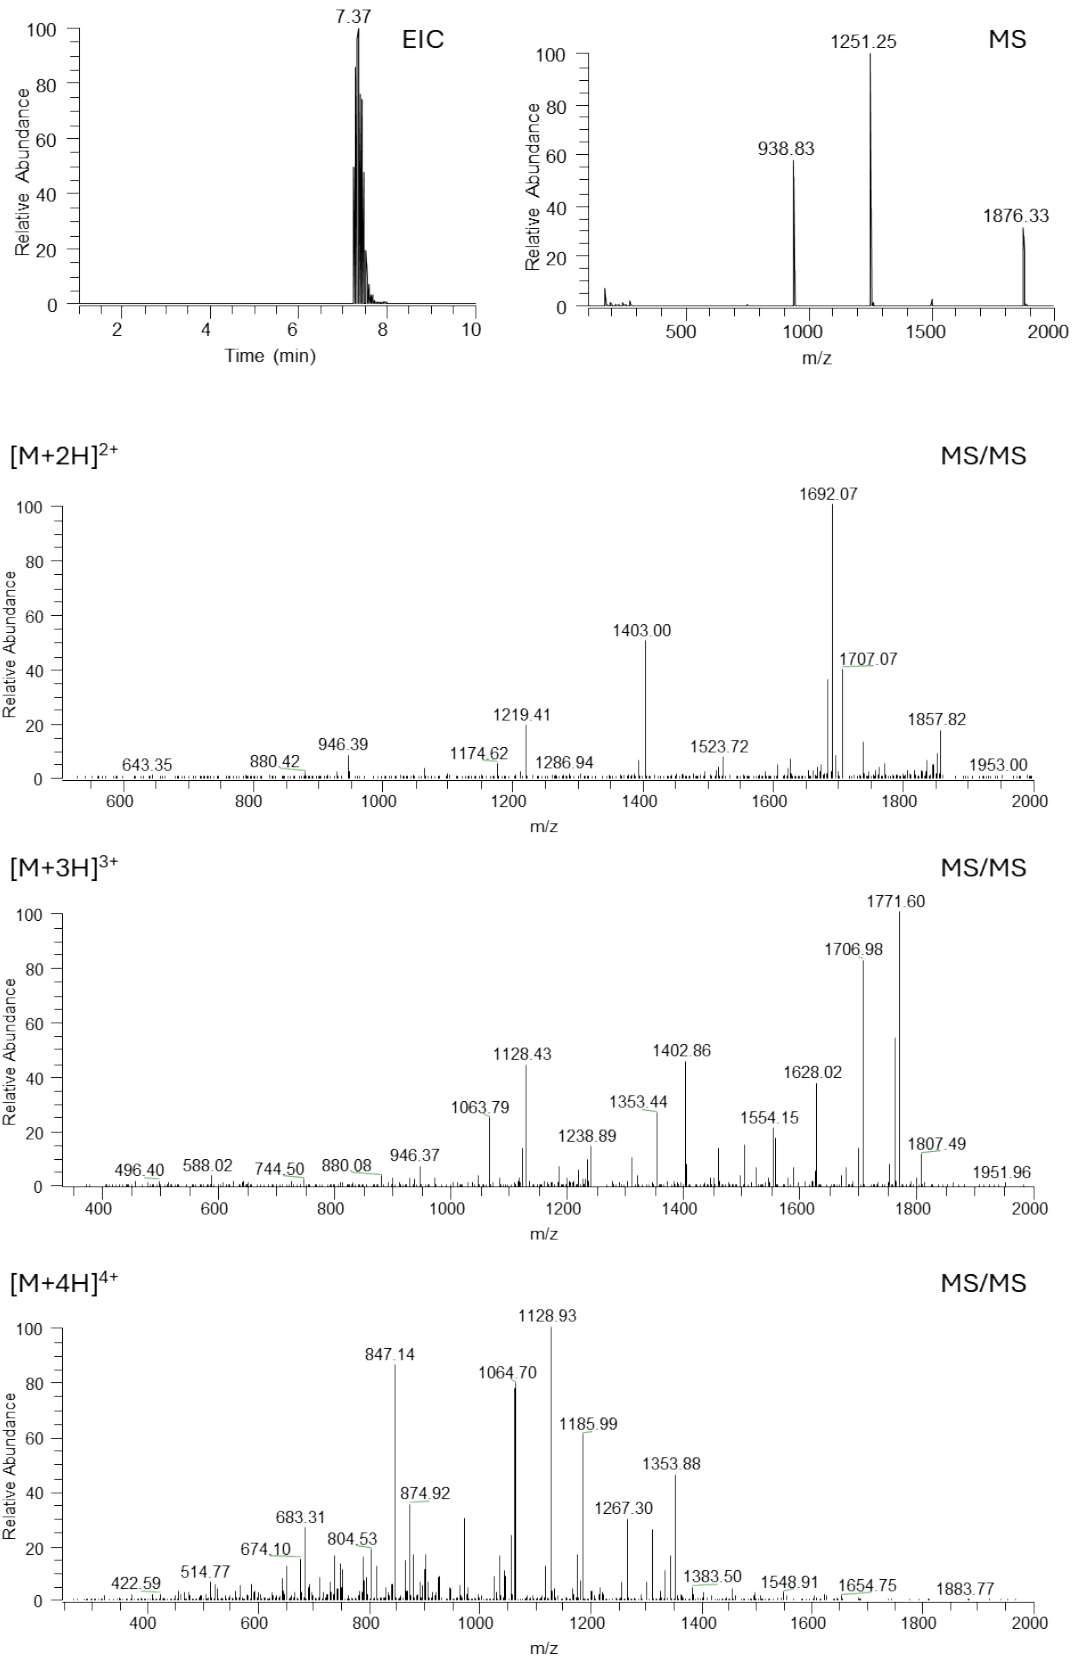

Figure S2-5: EIC, MS and MS/MS data LGL

## Semaglutide (SGL)

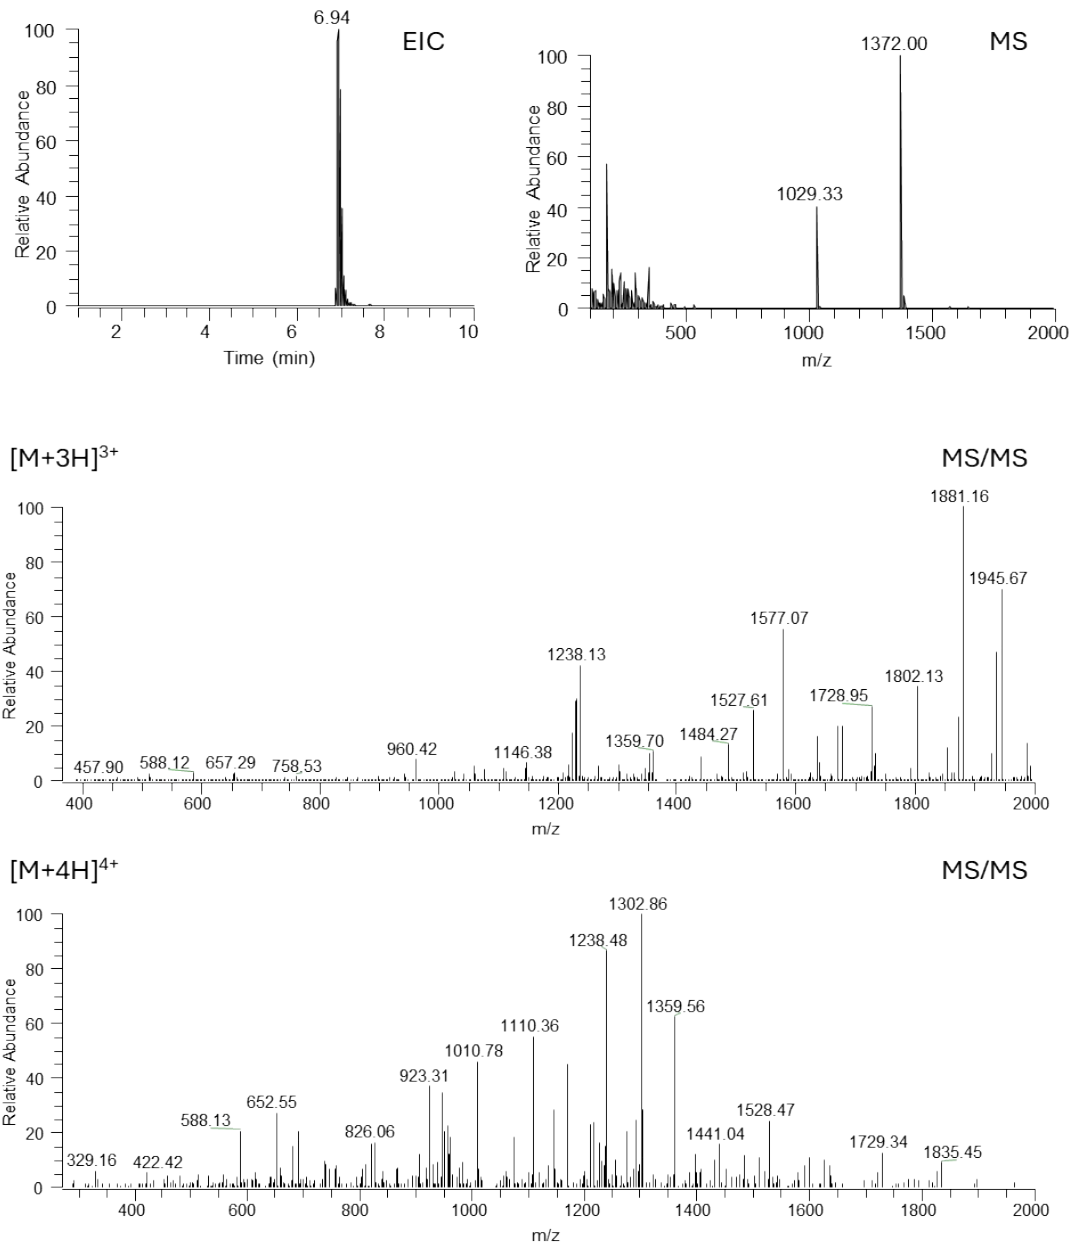

Figure S2-6: EIC, MS and MS/MS data SGL

# Cyclosporin (CSA)

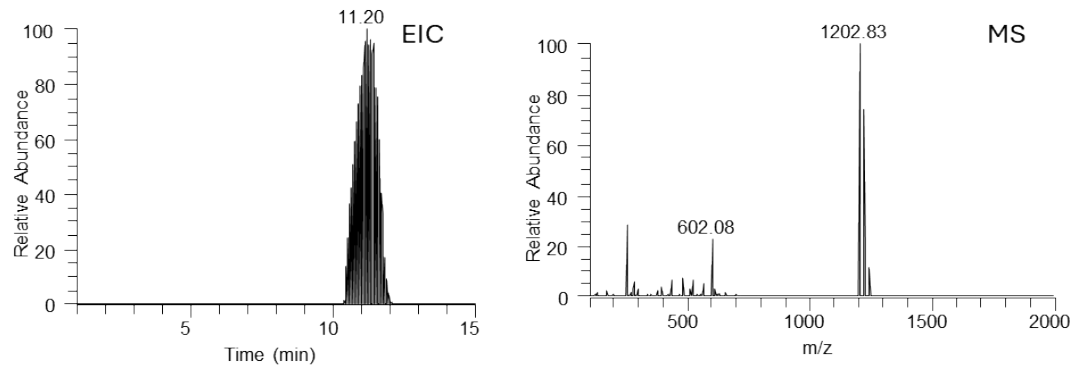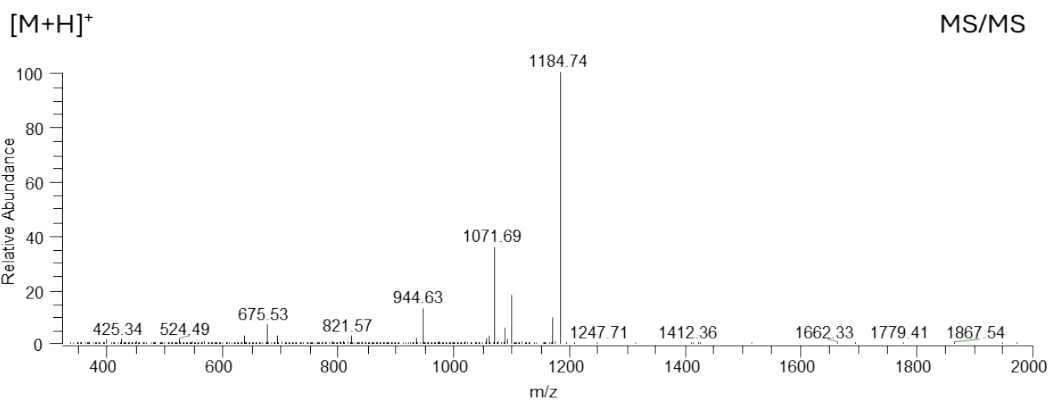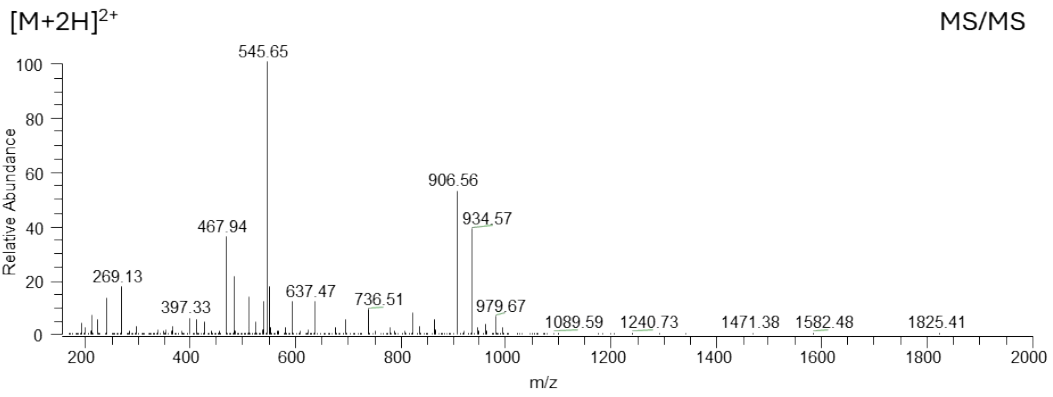

Figure S2-7: EIC, MS and MS/MS data CSA

# Cyclosporin (CSA) MS<sup>n</sup>

[M+H]<sup>+</sup>

MS<sup>3</sup>

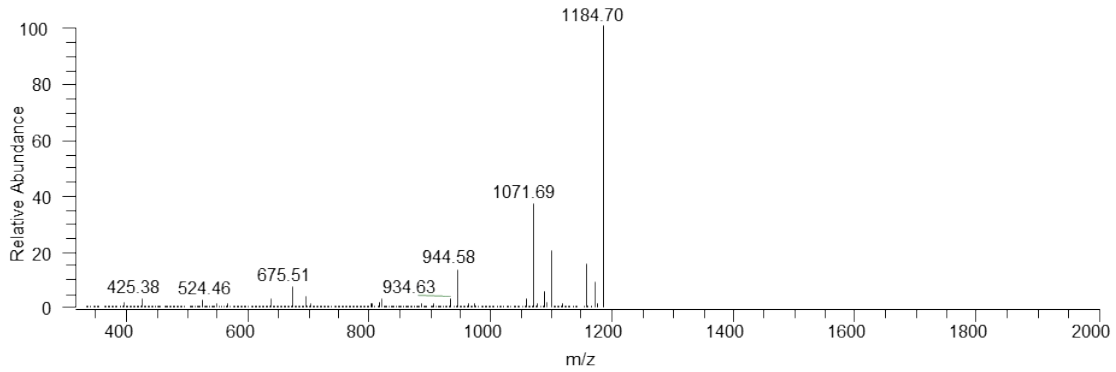

[M+2H]<sup>2+</sup>

MS<sup>3</sup>

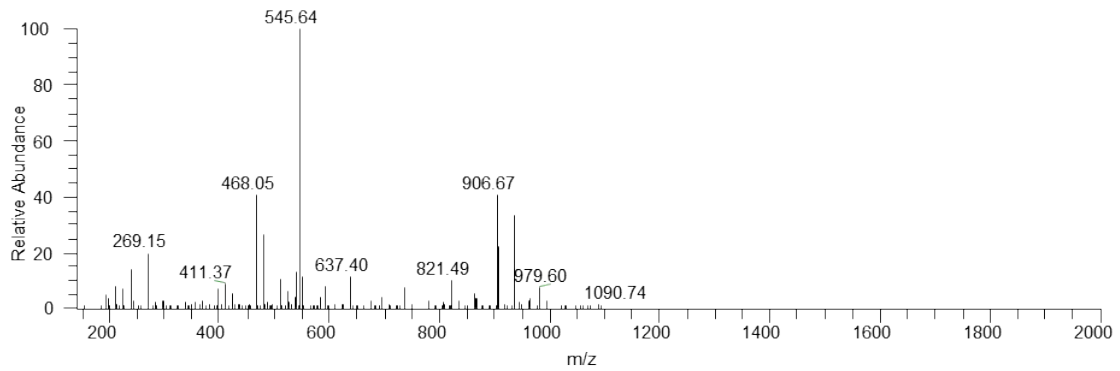

[M+H]<sup>+</sup>

MS<sup>4</sup>

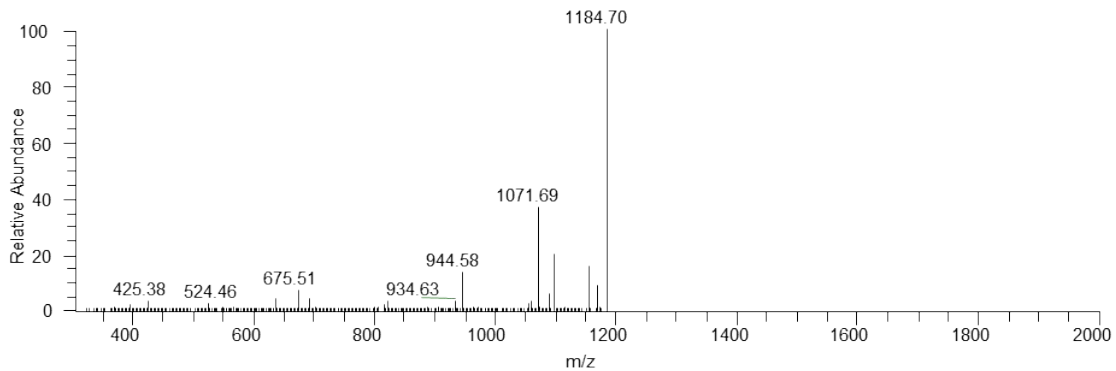

[M+2H]<sup>2+</sup>

MS<sup>4</sup>

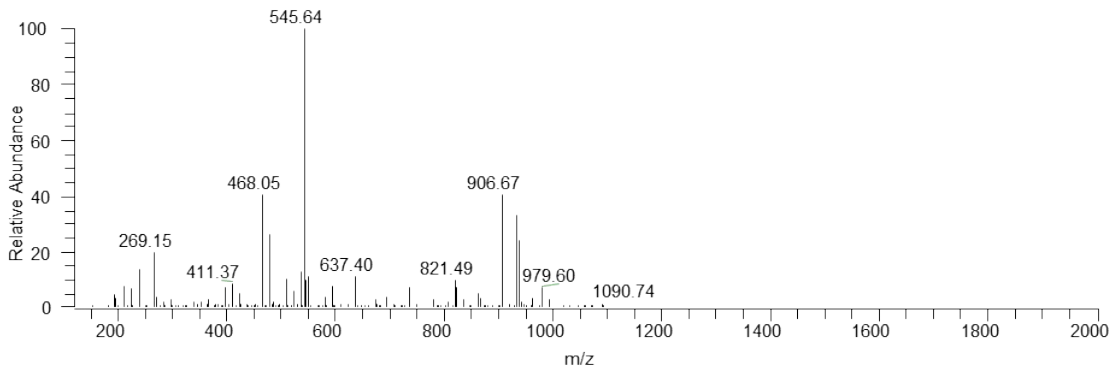

Figure S2-8: MS<sup>n</sup> data CSA

### Oxytocin (OXY)

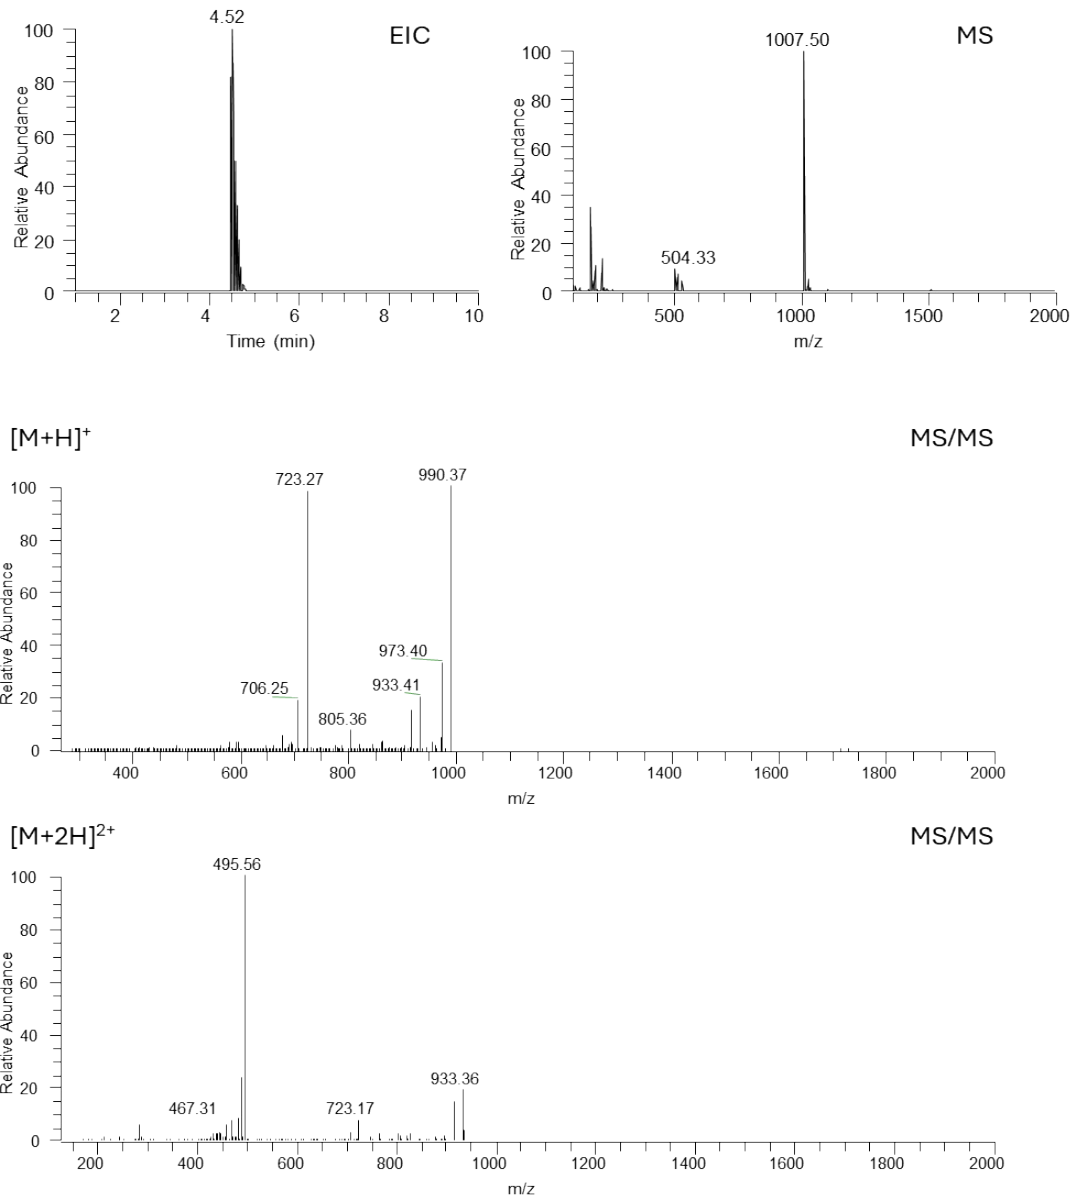

Figure S2-9: EIC, MS and MS/MS data OXY

### Somatostatin (SMT)

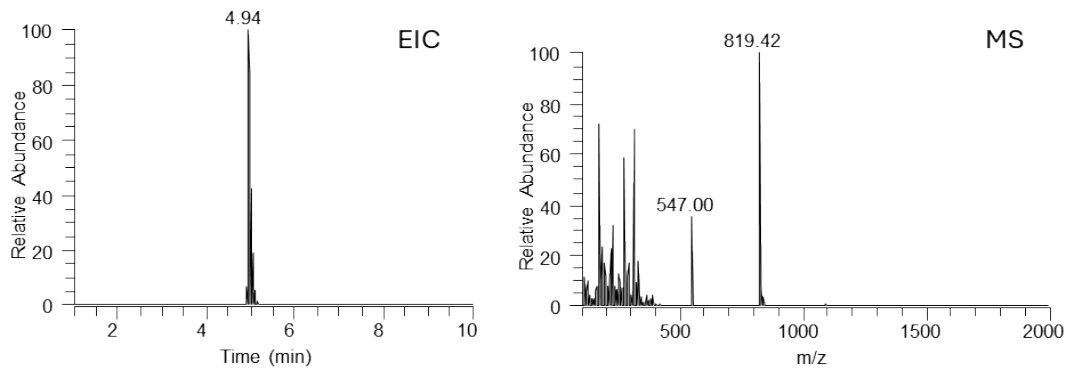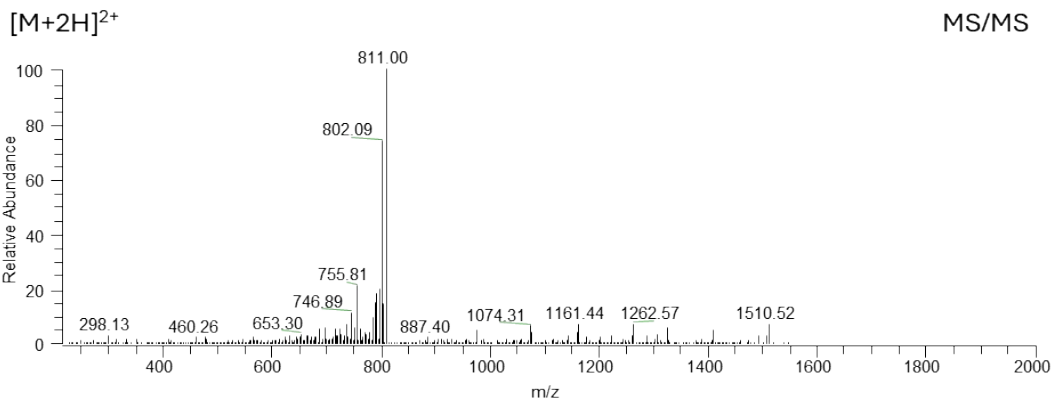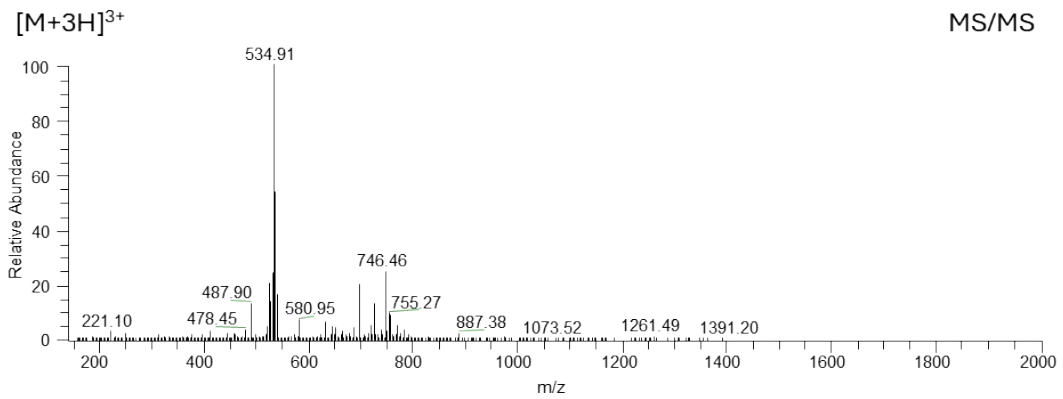

Figure S2-10: EIC, MS and MS/MS data SMT

## Oxytocin (OXY) ETD + CID

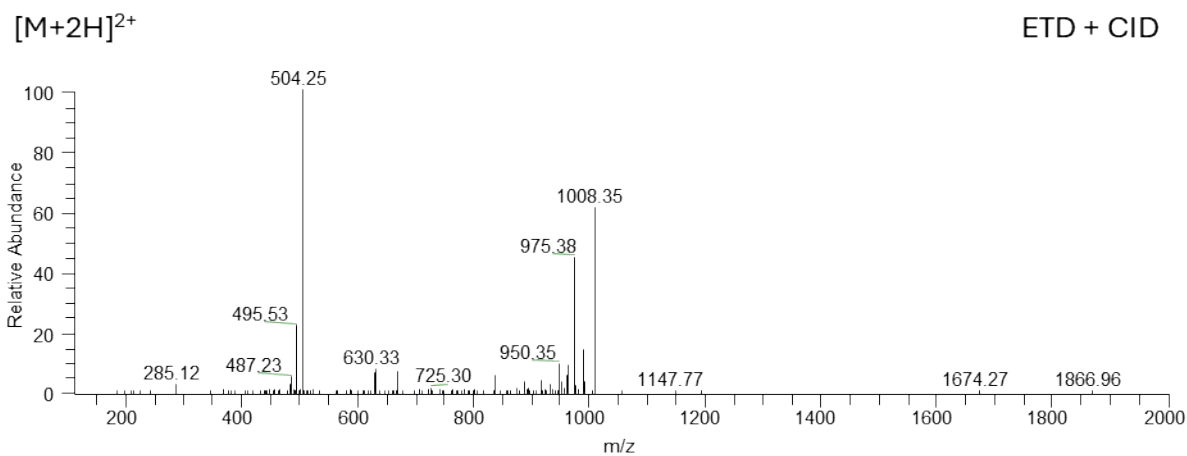

## Somatostatin (SMT) ETD + CID

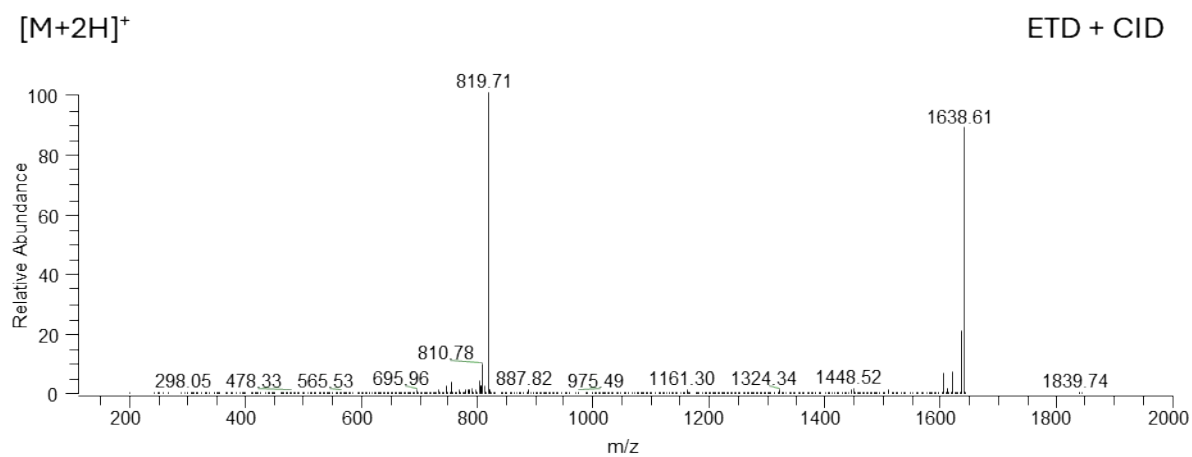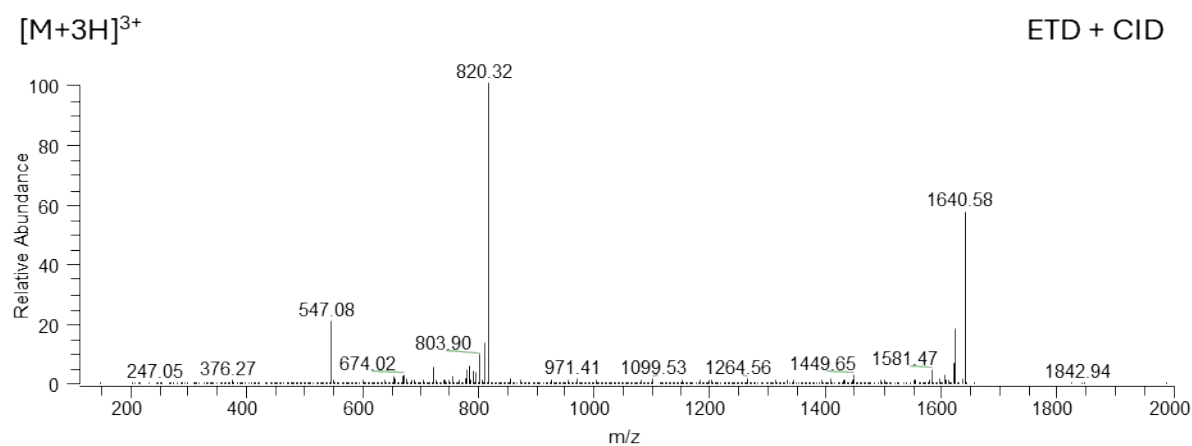

Figure S2-11: MS/MS ETD + CID of OXY and SMT

### S3 Assigned MS/MS data

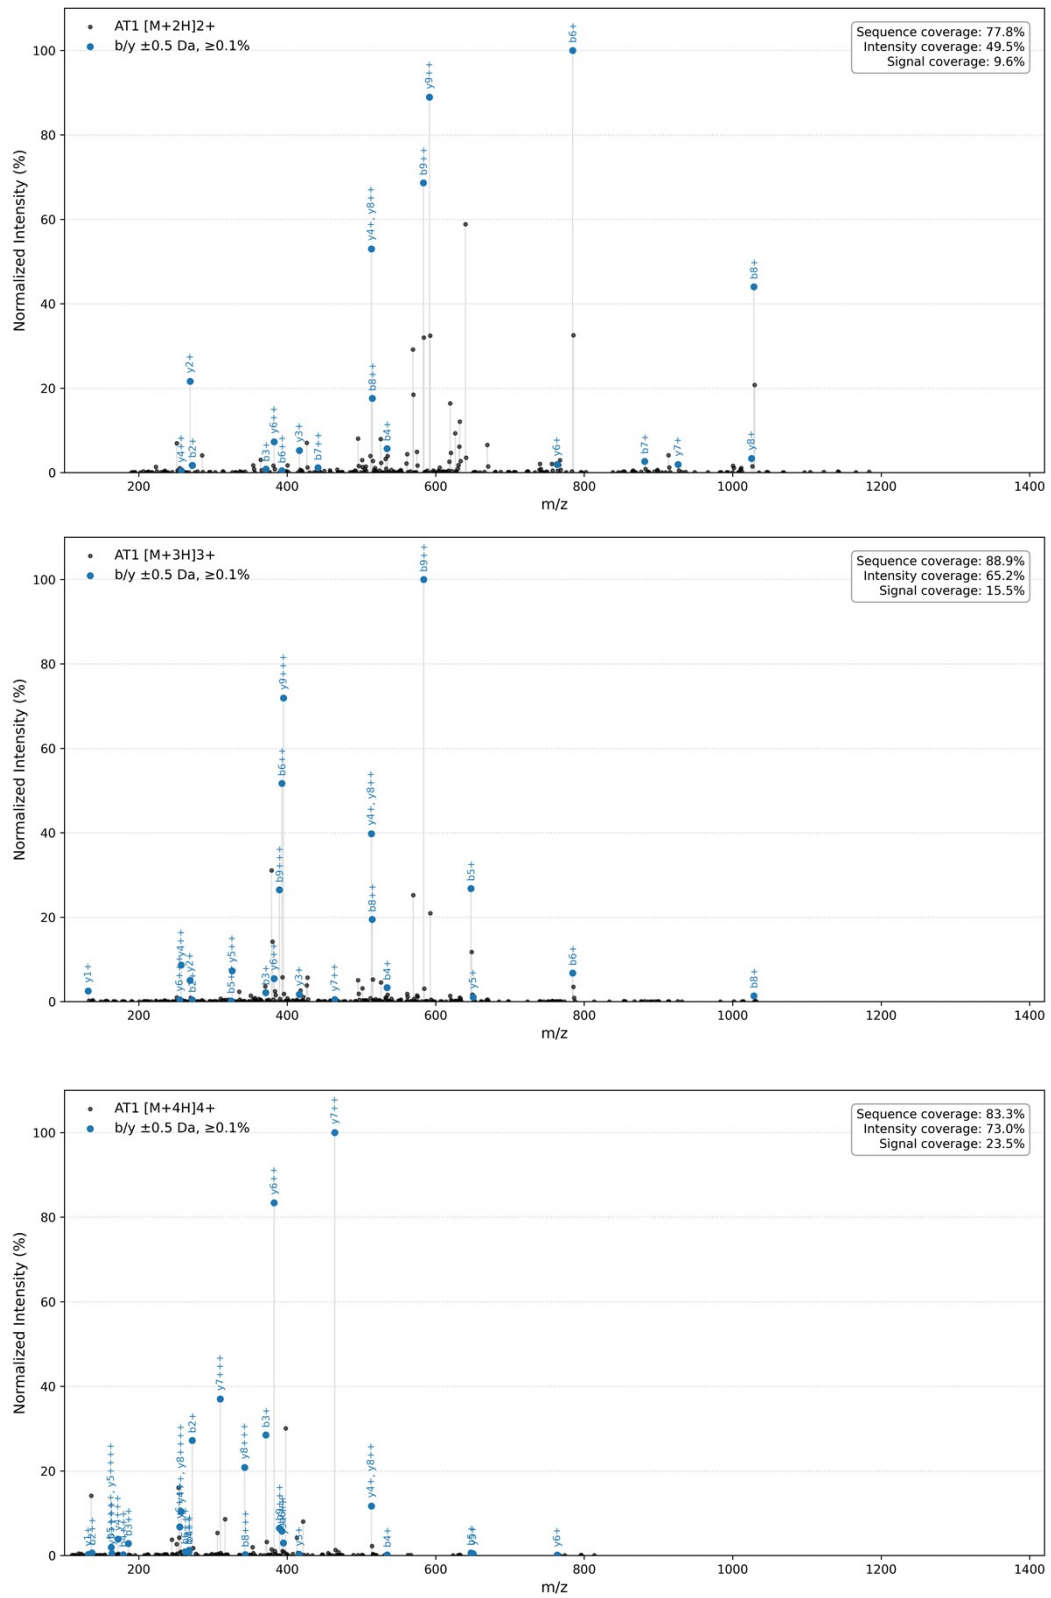

Figure S3-1: MS/MS data assigned AT1



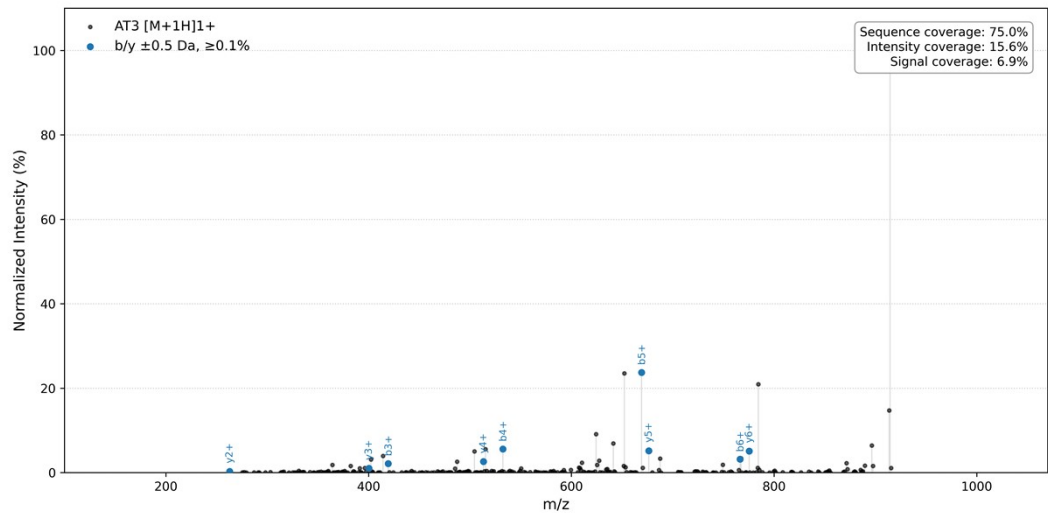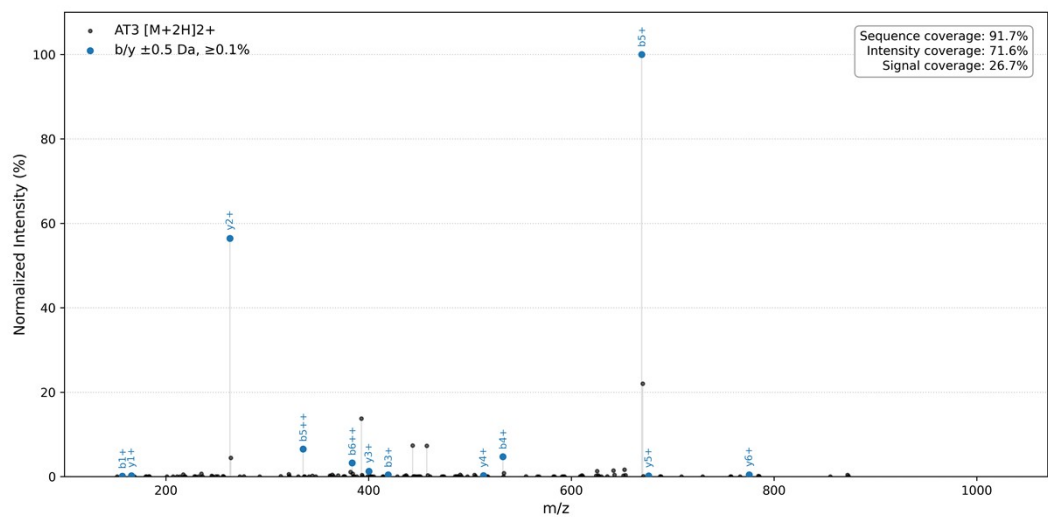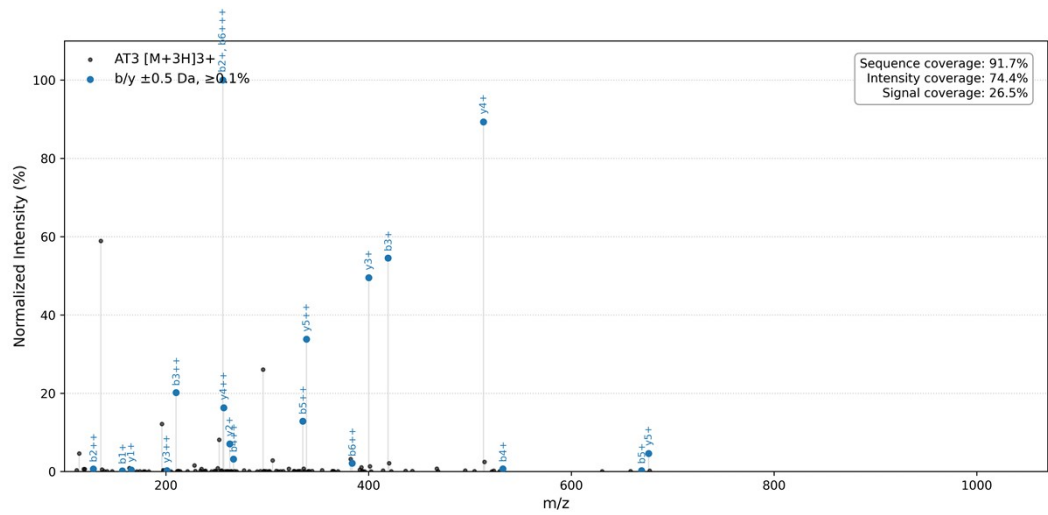

Figure S3-3: MS/MS data assigned AT3

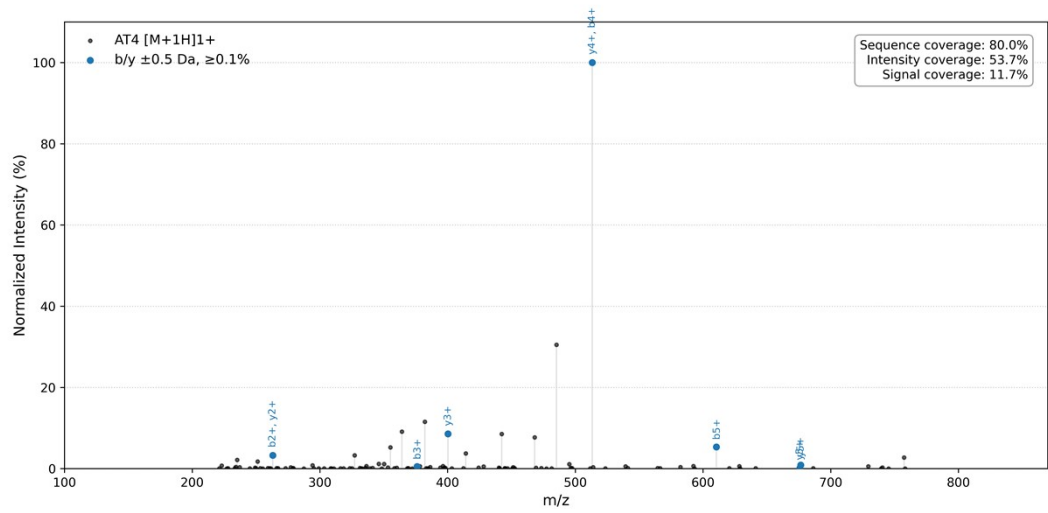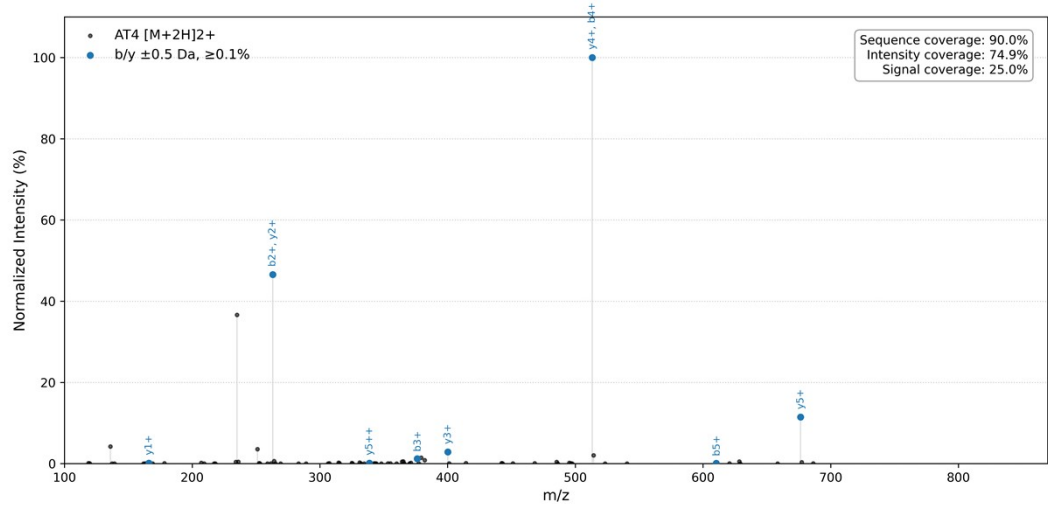

Figure S3-4: MS/MS data assigned AT4

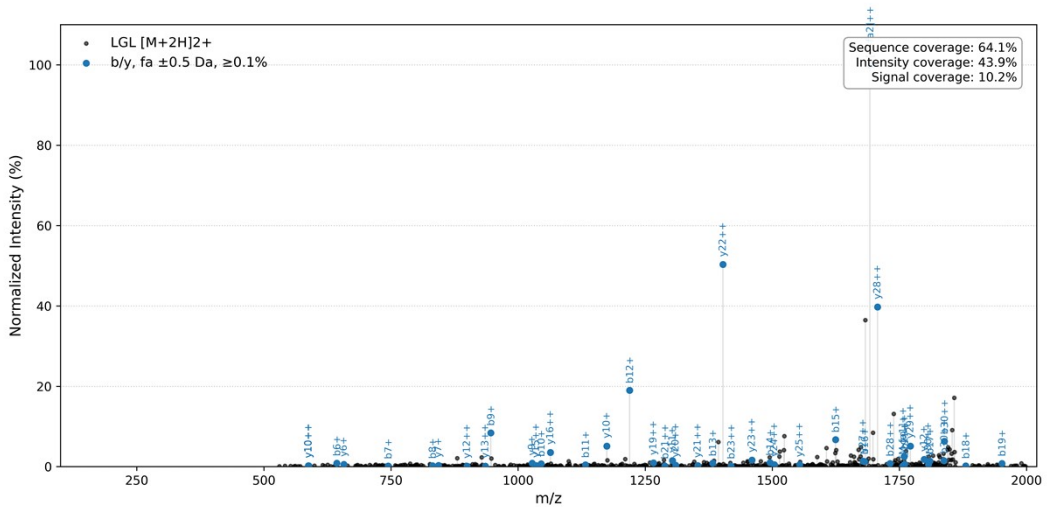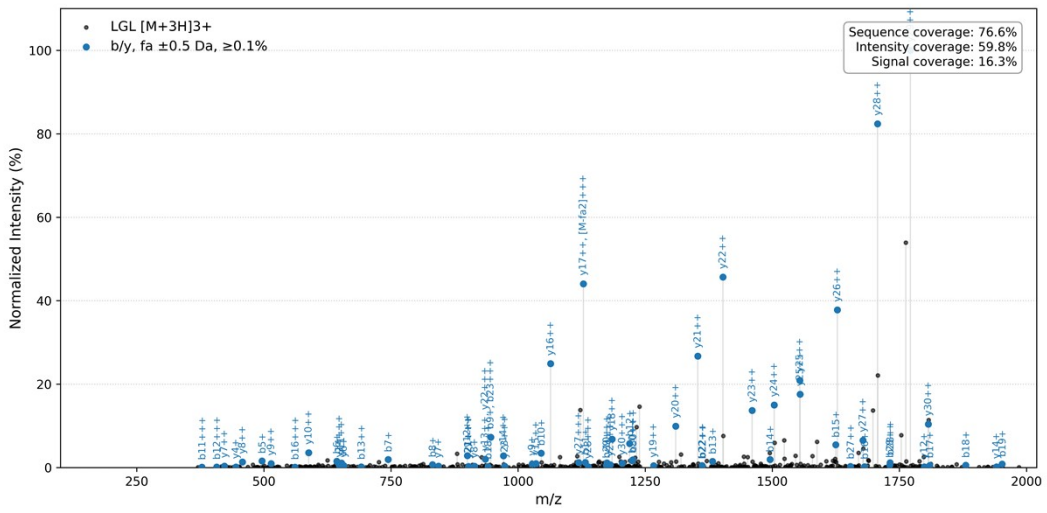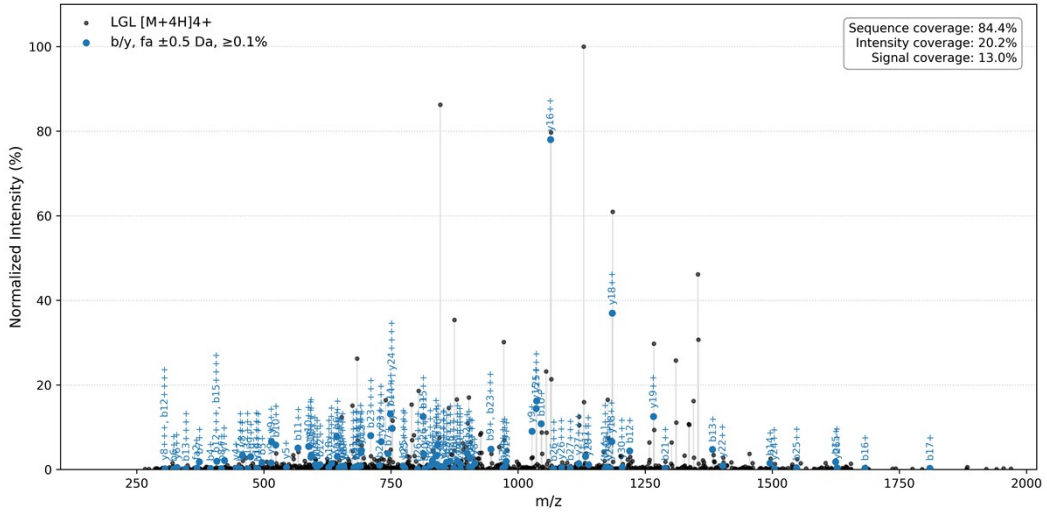

Figure S3-5: MS/MS data assigned LGL

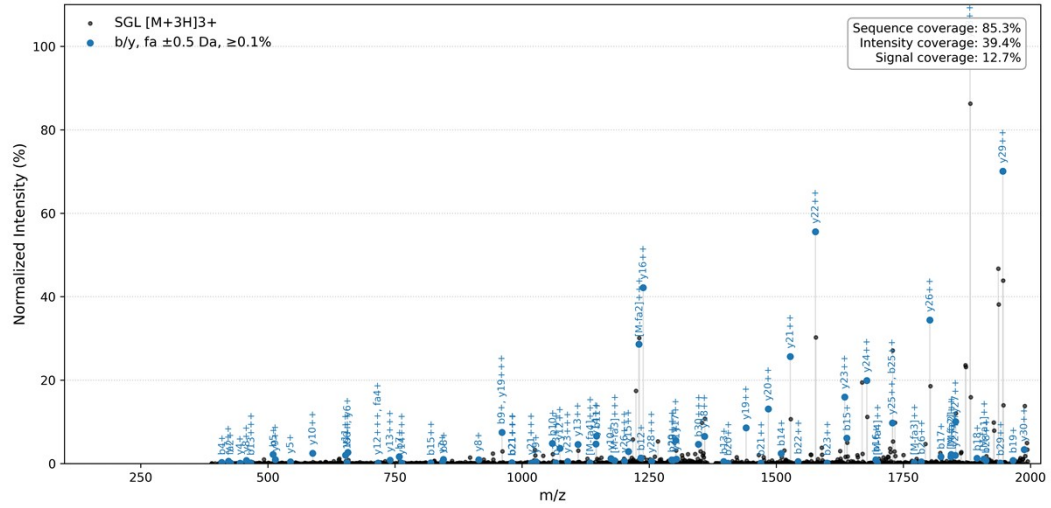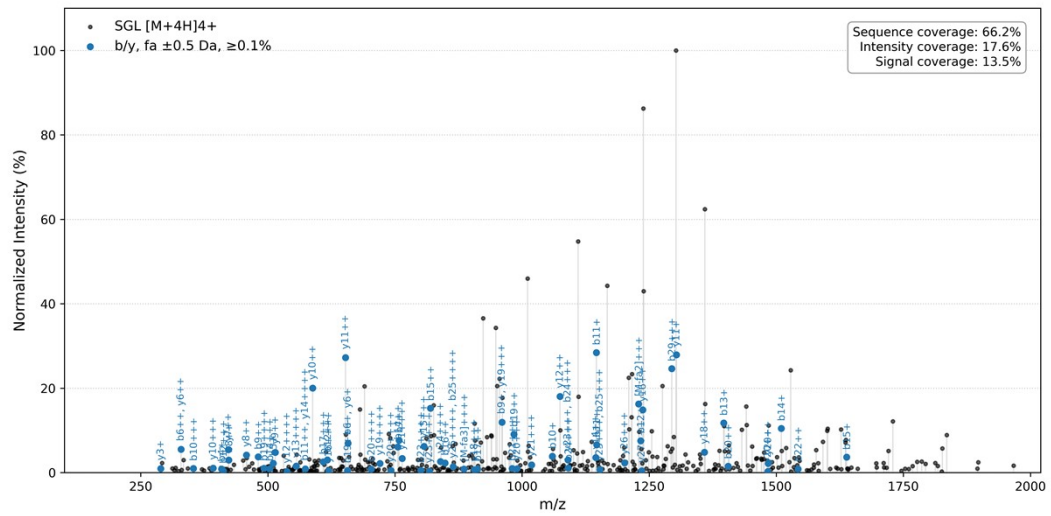

Figure S3-6: MS/MS data assigned SGL

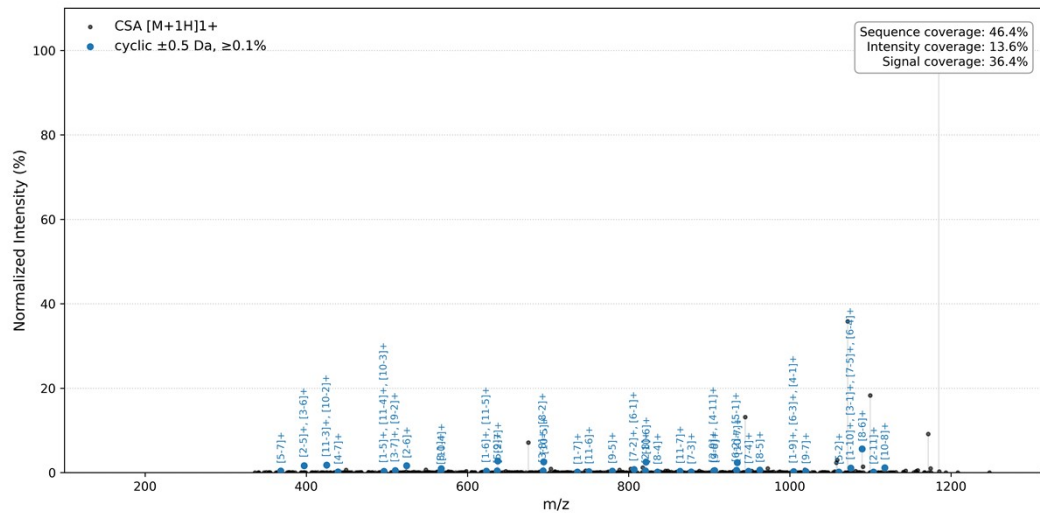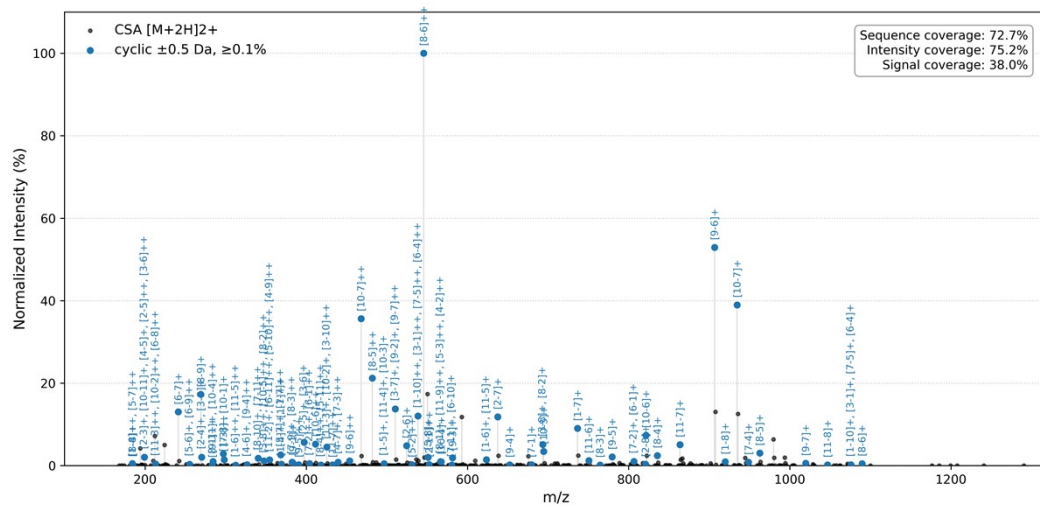

Figure S3-7: MS/MS data assigned CSA



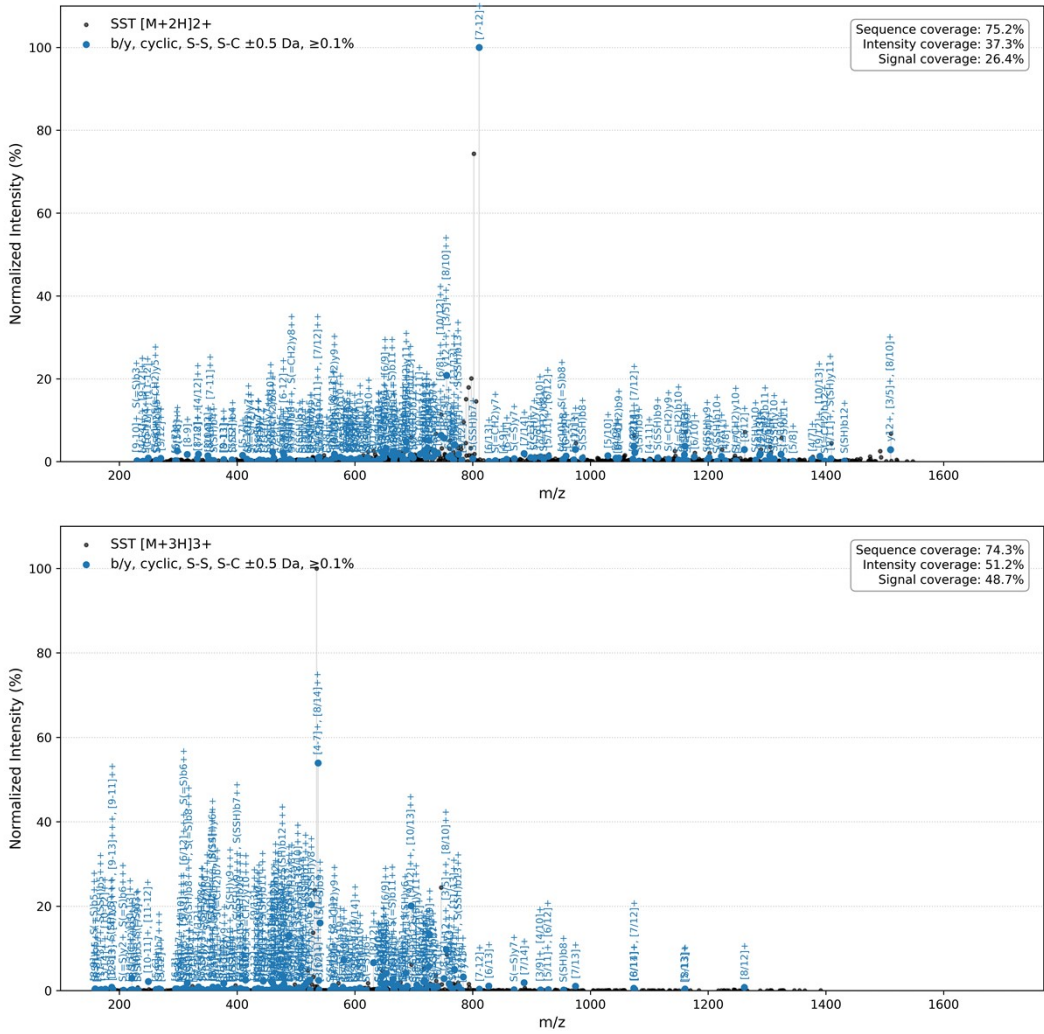

Figure S3-9: MS/MS data assigned SMT

## S4 Additional figures

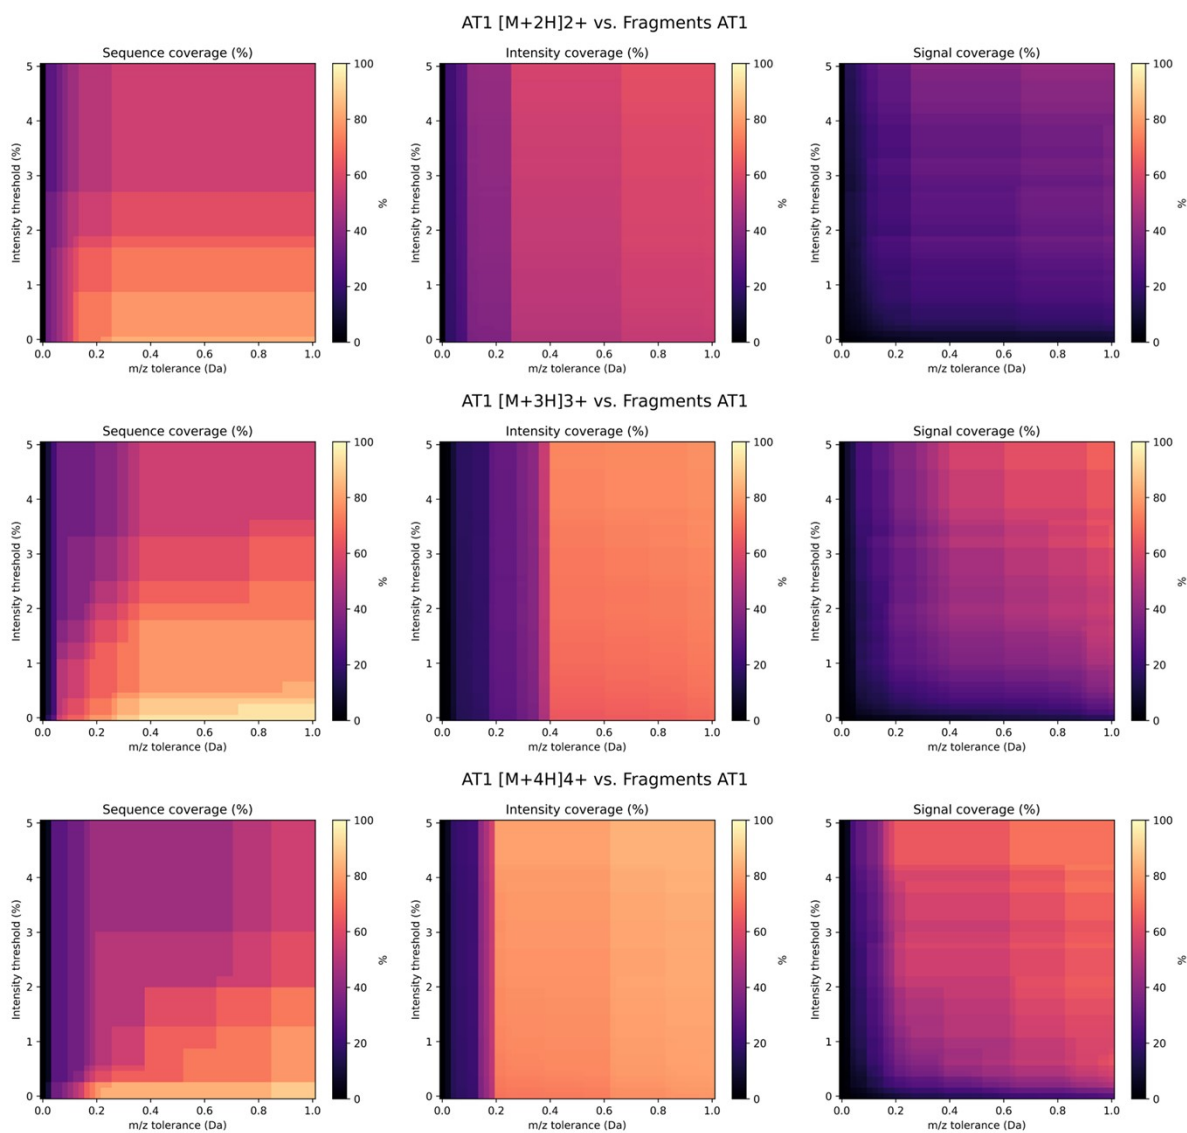

Figure S4-1: Heatmaps showing the sequence coverage, intensity coverage and signal coverage in dependence of the intensity threshold and the m/z threshold defined for all charged states of the AT1 MSMS spectra assignment with AT1 fragments.

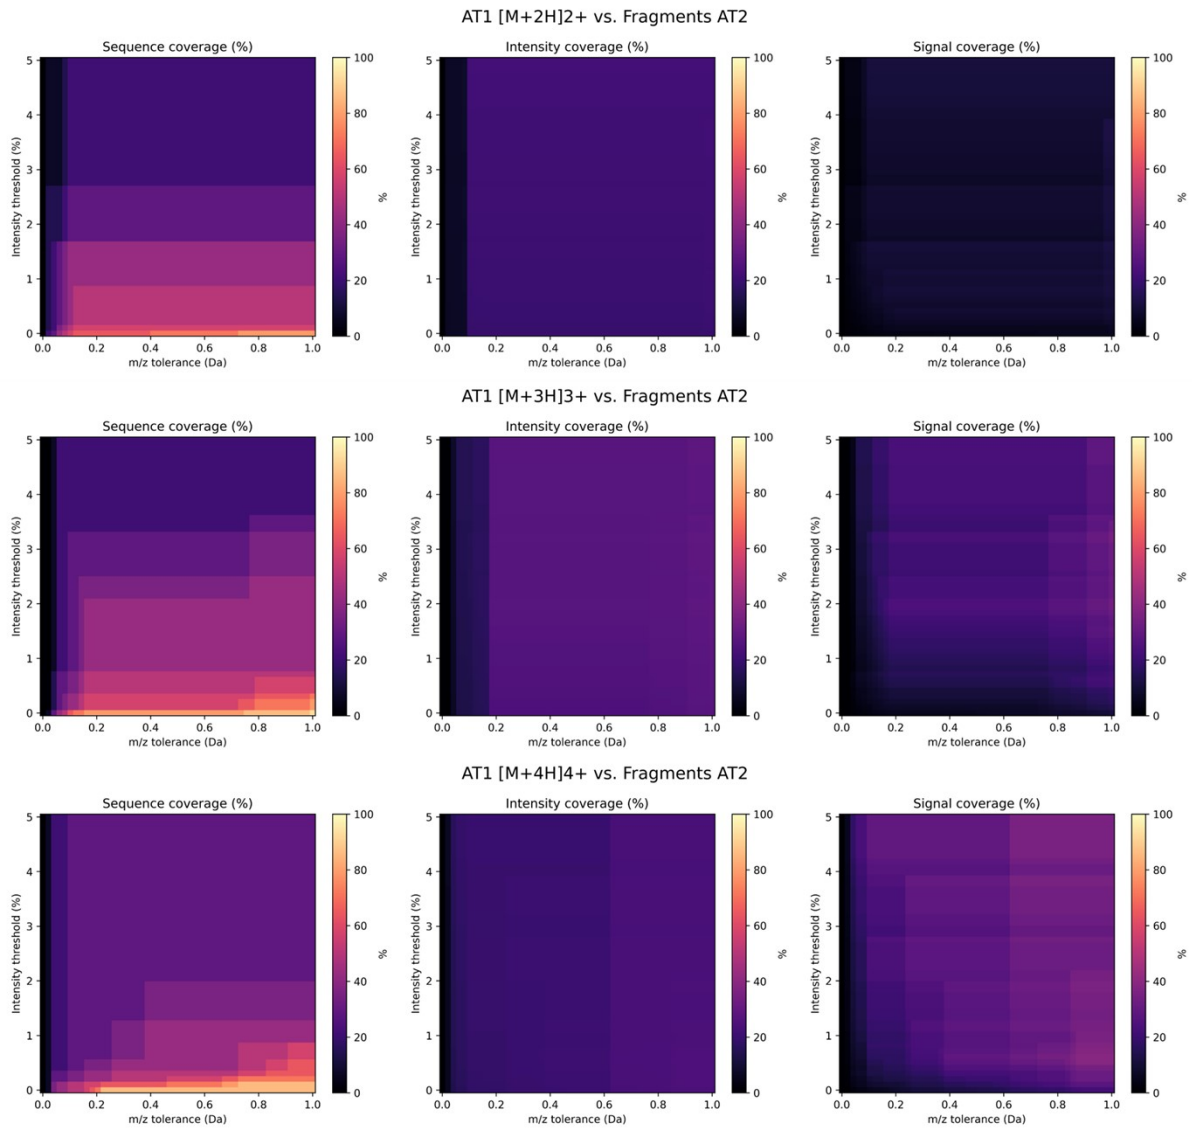

Figure S4-2: Heatmaps showing the sequence coverage, intensity coverage and signal coverage in dependence of the intensity threshold and the m/z threshold defined for all charged states of the AT1 MSMS spectra assigned with AT2 fragments (related peptide).

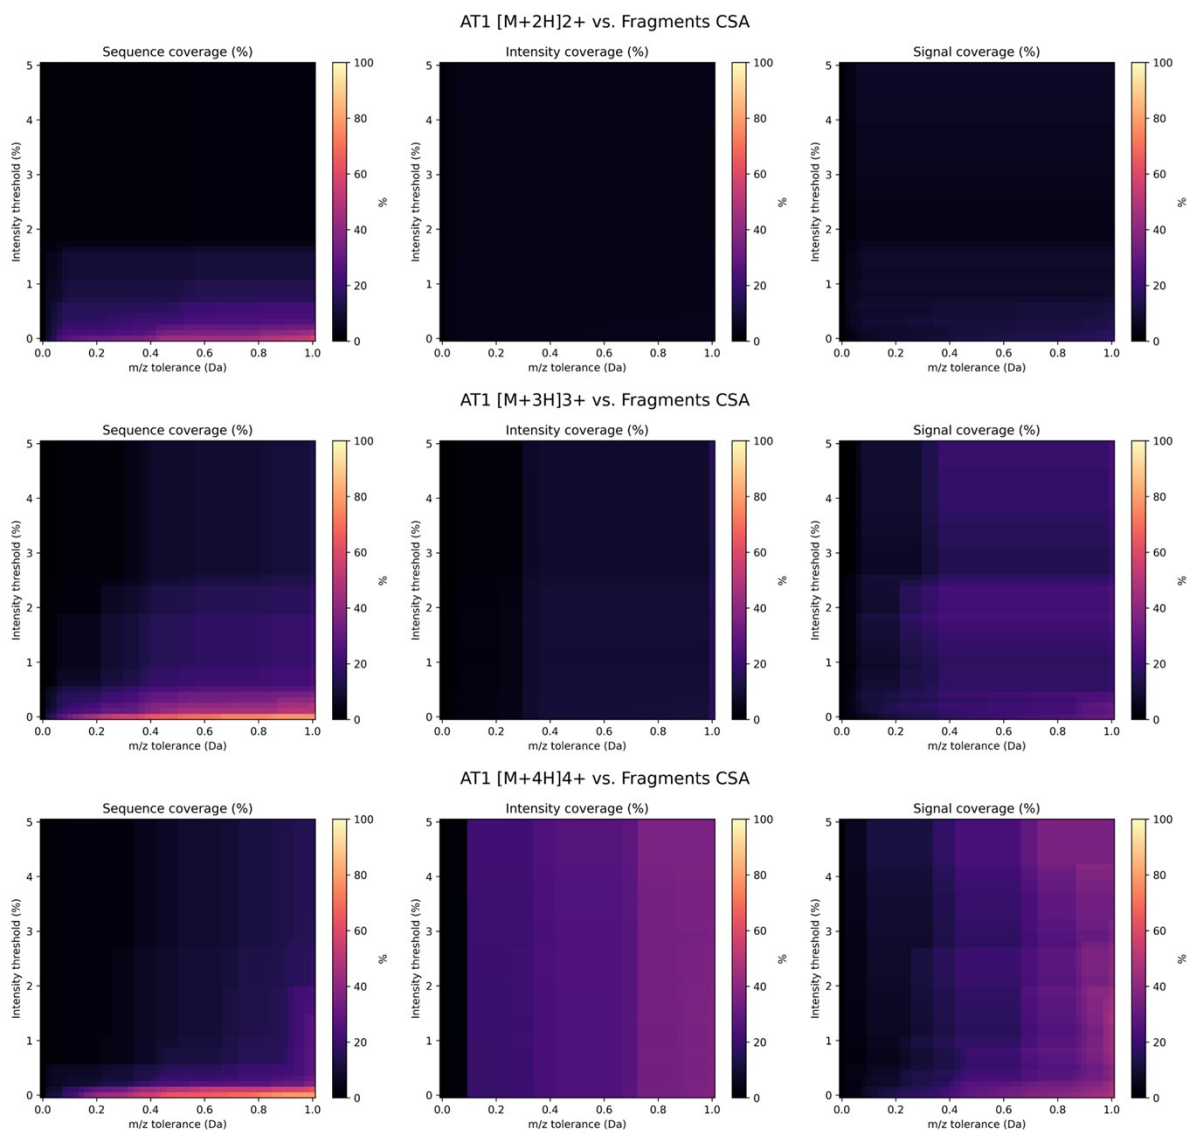

Figure S4-3: Heatmaps showing the sequence coverage, intensity coverage and signal coverage in dependence of the intensity threshold and the m/z threshold defined for all charged states of the AT1 MSMS spectra assignment with CSA fragments (unrelated peptide in similar mass range with high number of possible fragments).

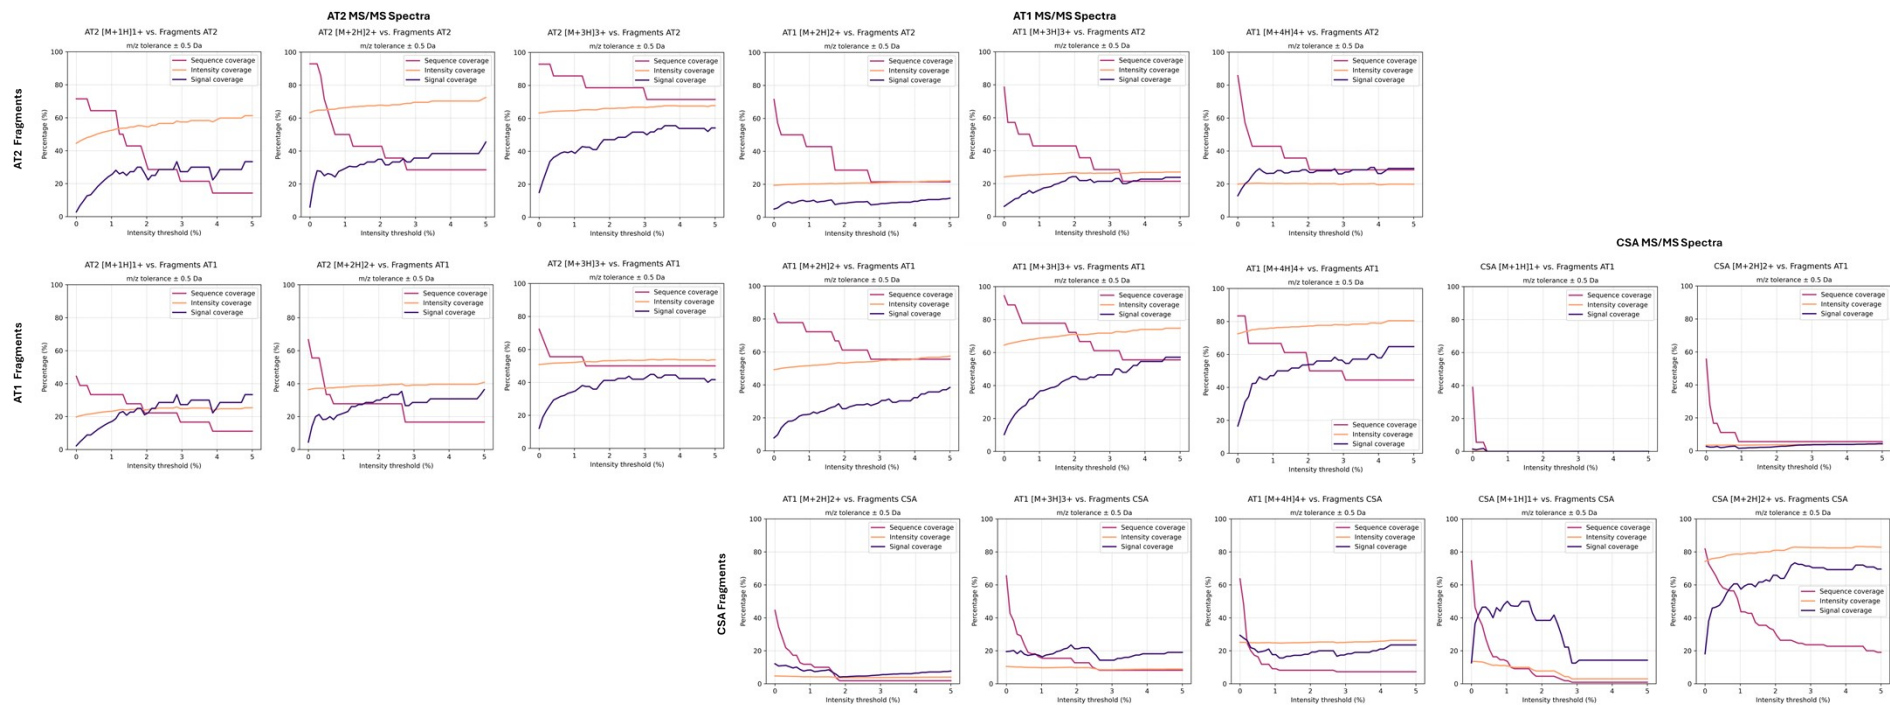

Figure S4-5: Comparison of correct and false MS/MS spectra assignment for linear peptides AT1 and AT2 and head-to-tail cyclized peptide CSA.

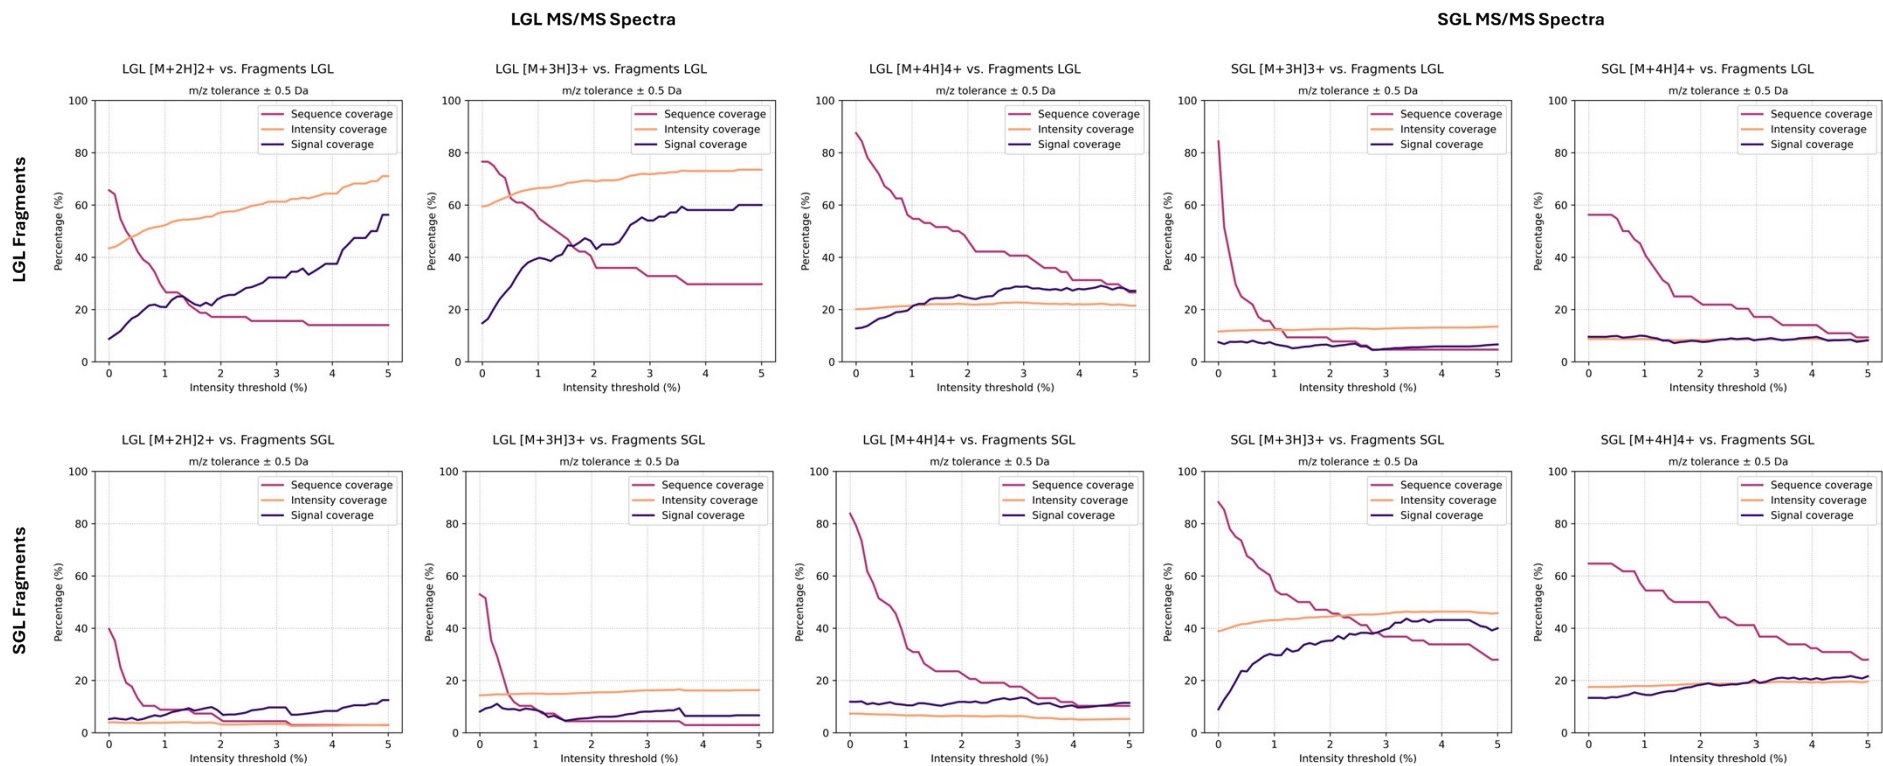

Figure S4-6: Comparison of correct and false MS/MS spectra assignment for fatty acid modified peptides LGL and SGL.

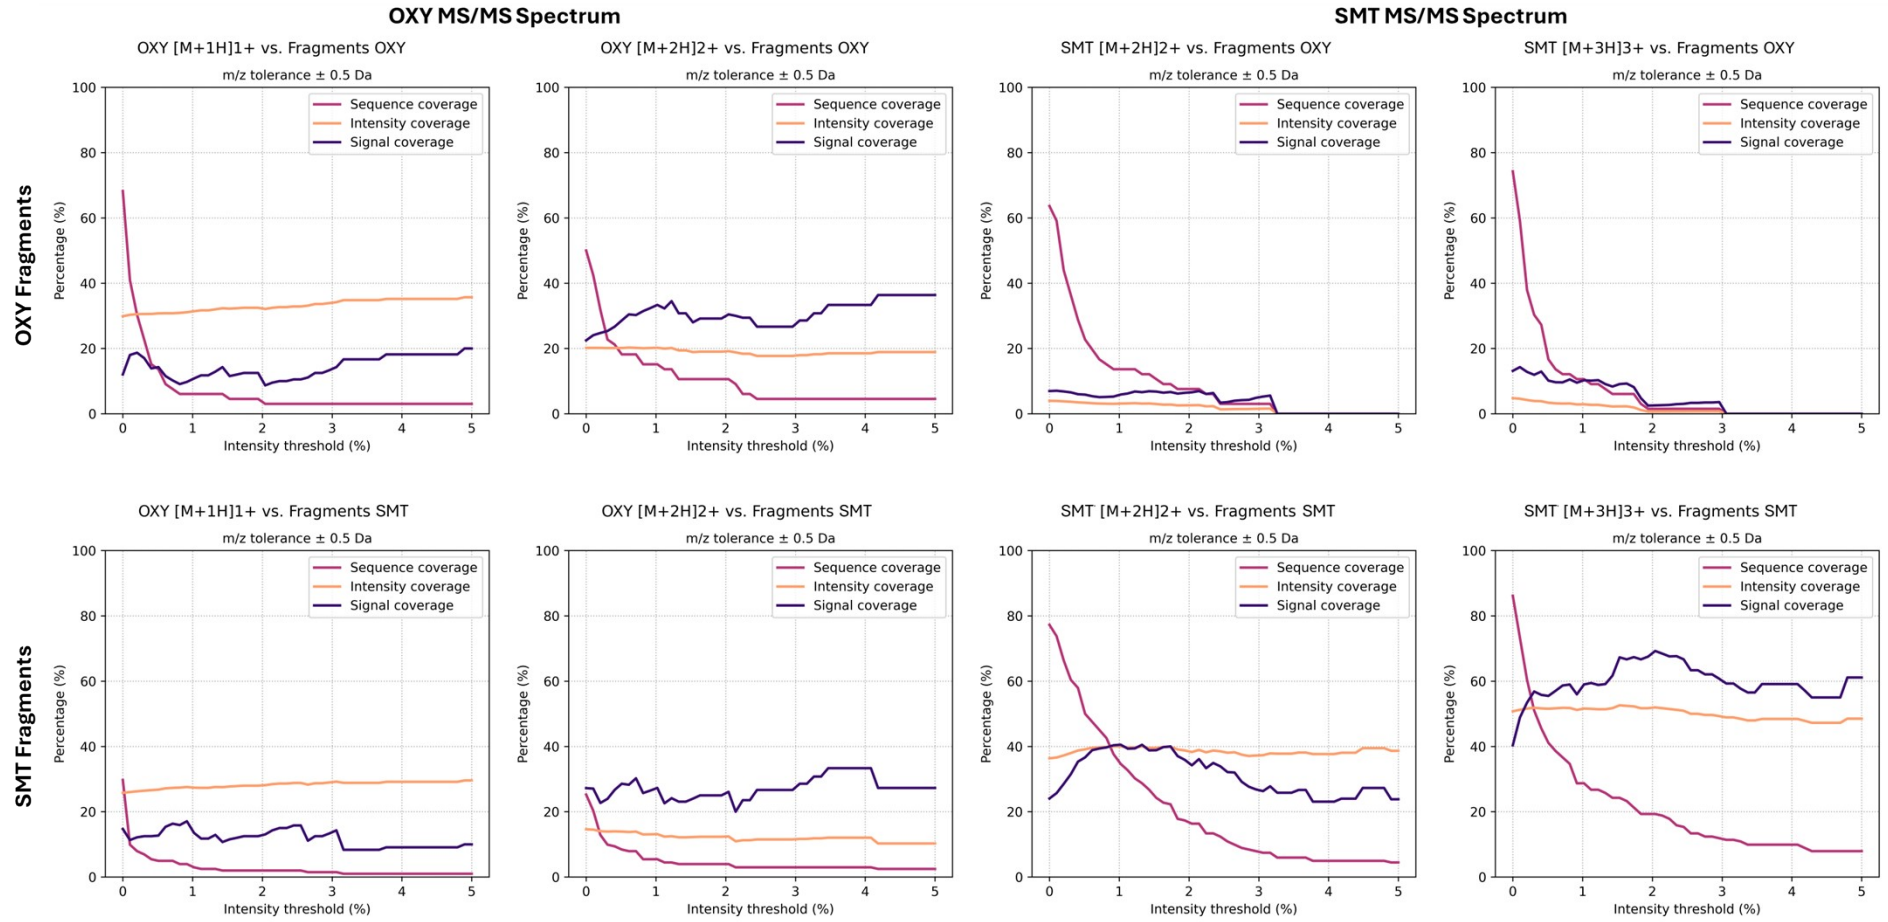

Figure S4-7: Comparison of correct and false MS/MS spectra assignment for peptides OXY and SMT with a disulfide bridge.

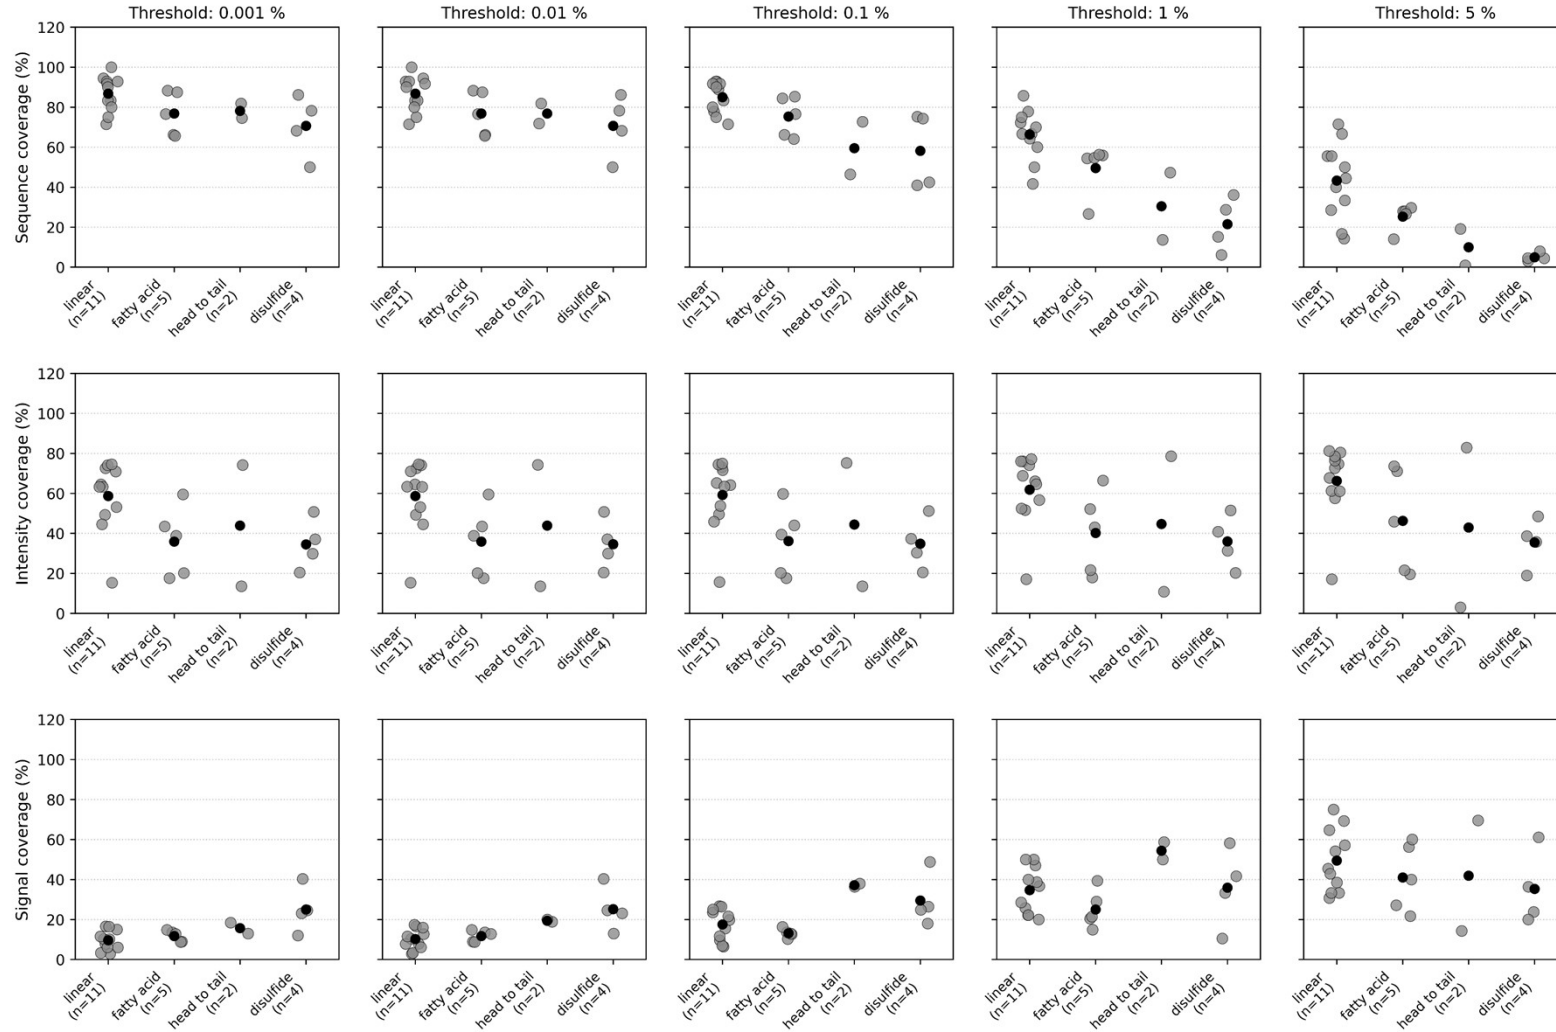

Figure S4-8: Average sequence coverage, intensity coverage and signal coverage of different categories of peptides (linear, fatty acid modified, head-to-tail cyclized and with disulfide bridge) for different intensity thresholds and a  $m/z$  tolerance  $\pm 0.5$  Da defined for assignment. Individual data points are shown in grey and the mean value in black.

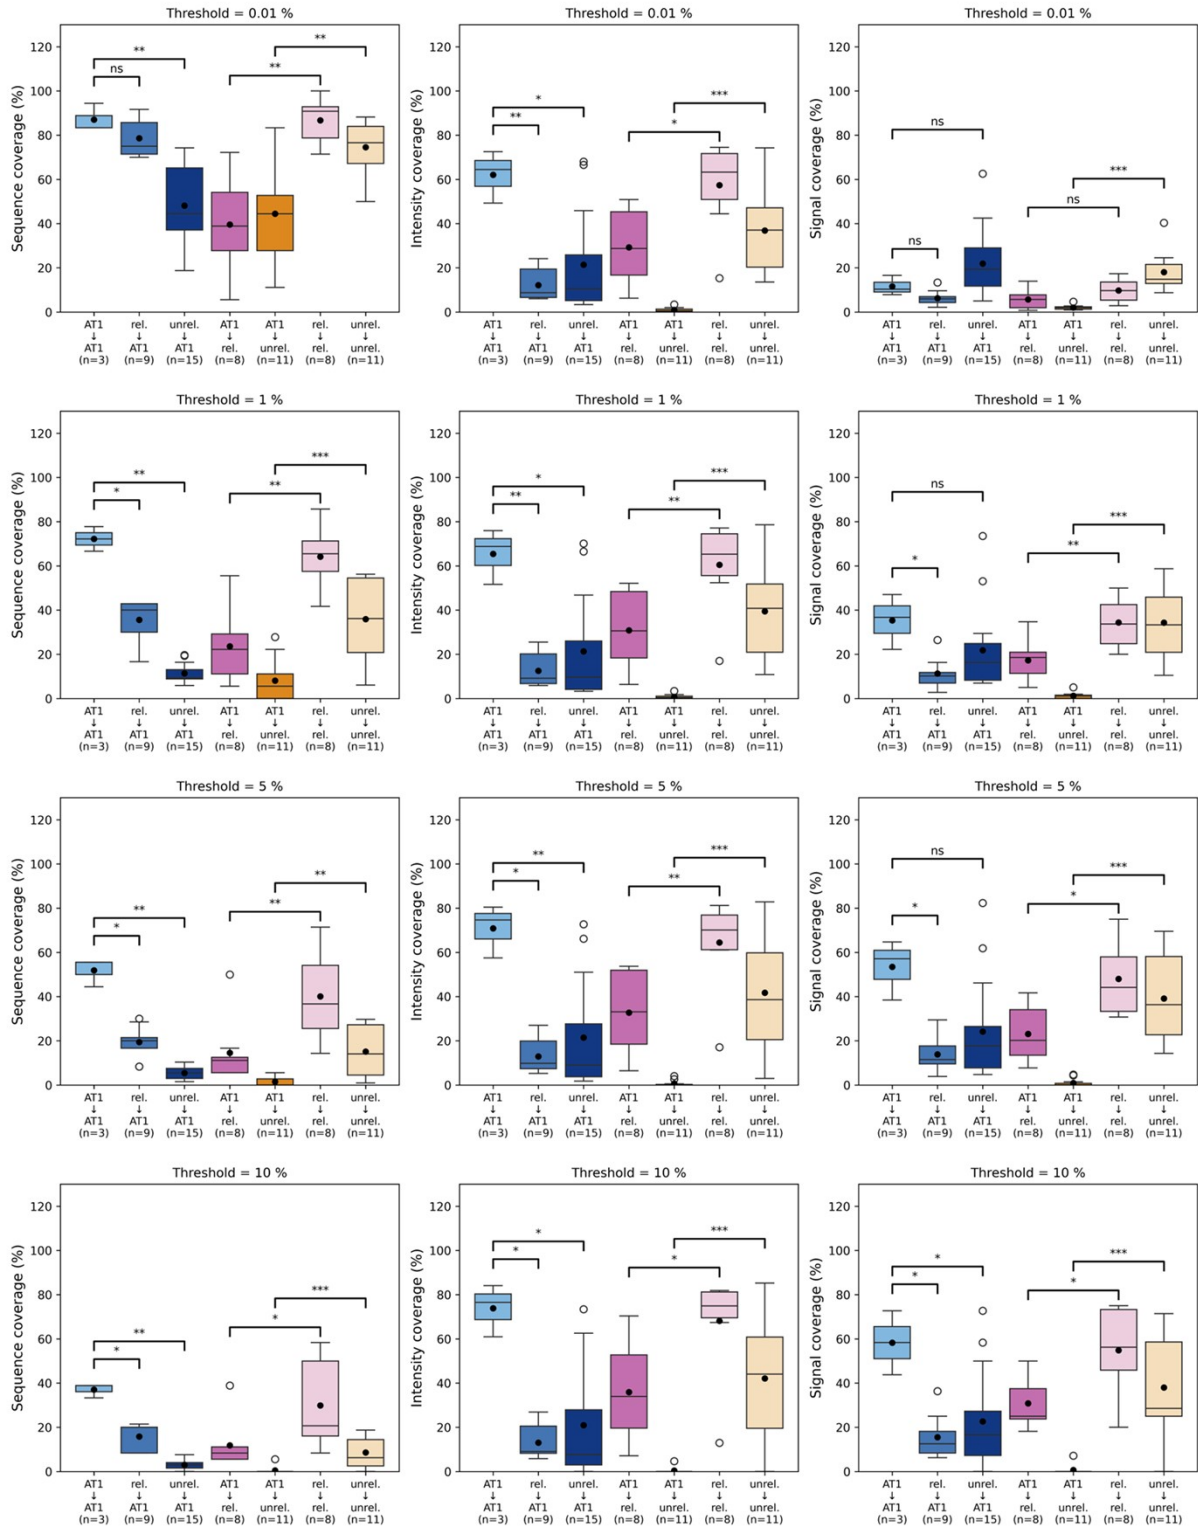

Figure S4-9: Comparison of different assignment metrics to distinguish related and unrelated false assigned spectra for different intensity thresholds (%).

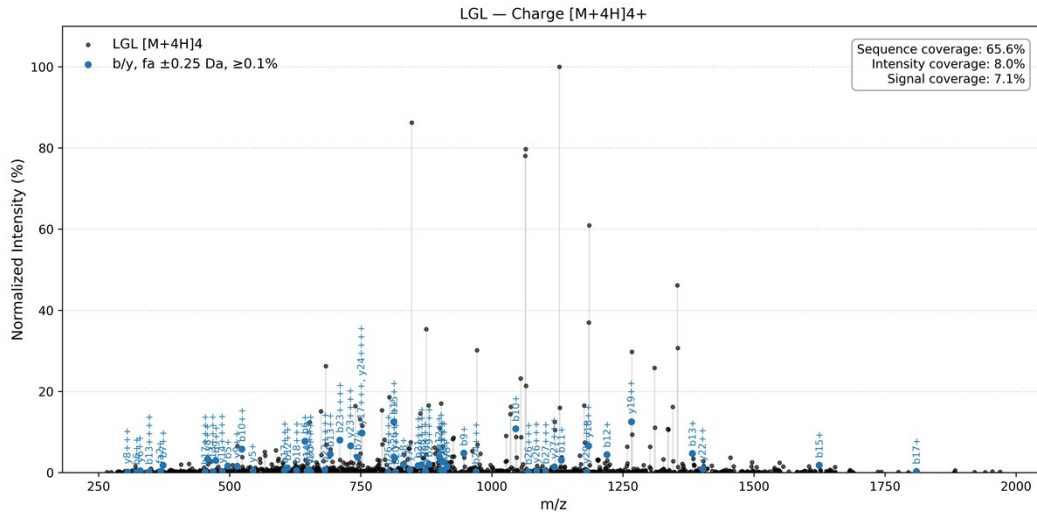

Figure S4-10: LGL [M+4H]<sup>4+</sup> MS/MS data assignment with a  $\pm 0.25$  Da tolerance including fa fragments.

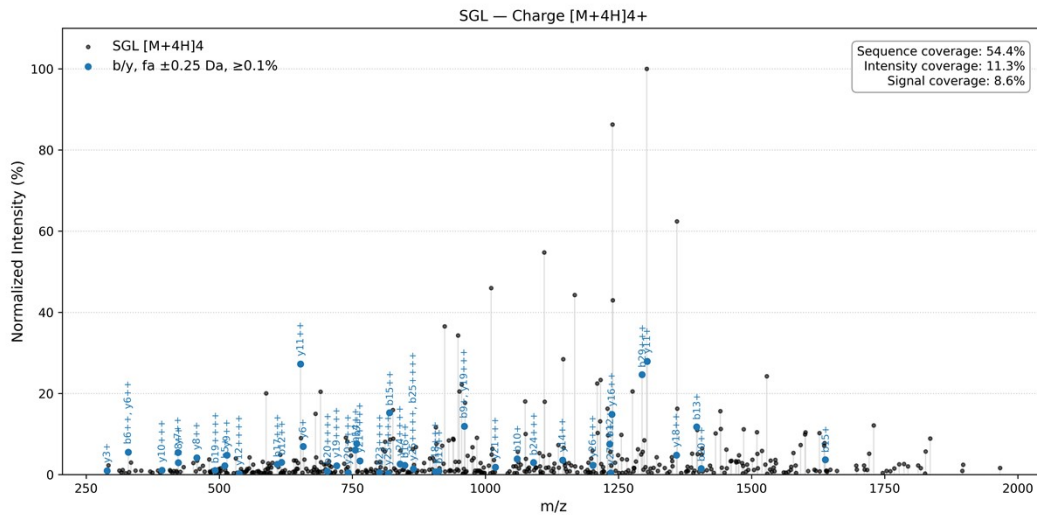

Figure S4-11: SGL [M+4H]<sup>4+</sup> MS/MS data assignment with a  $\pm 0.25$  Da tolerance including fa fragments.

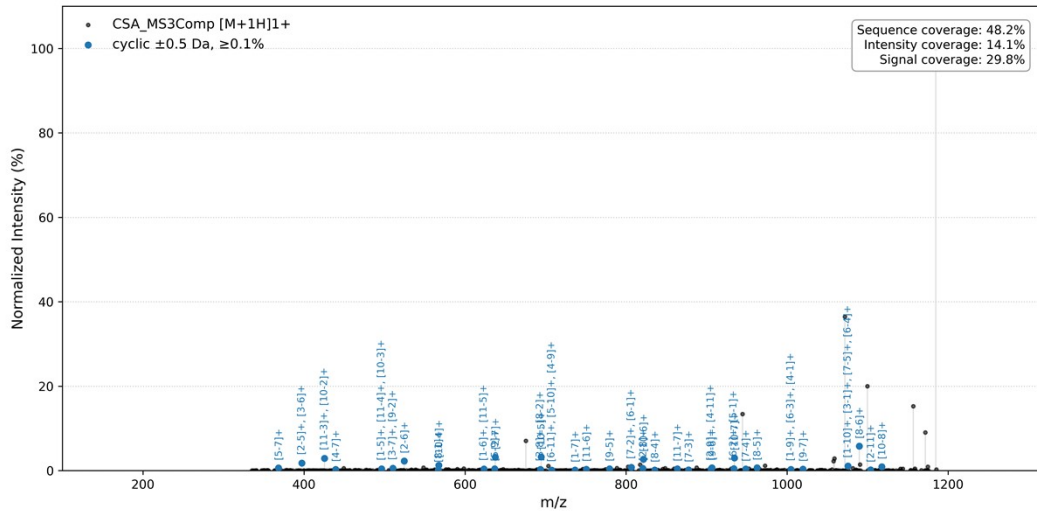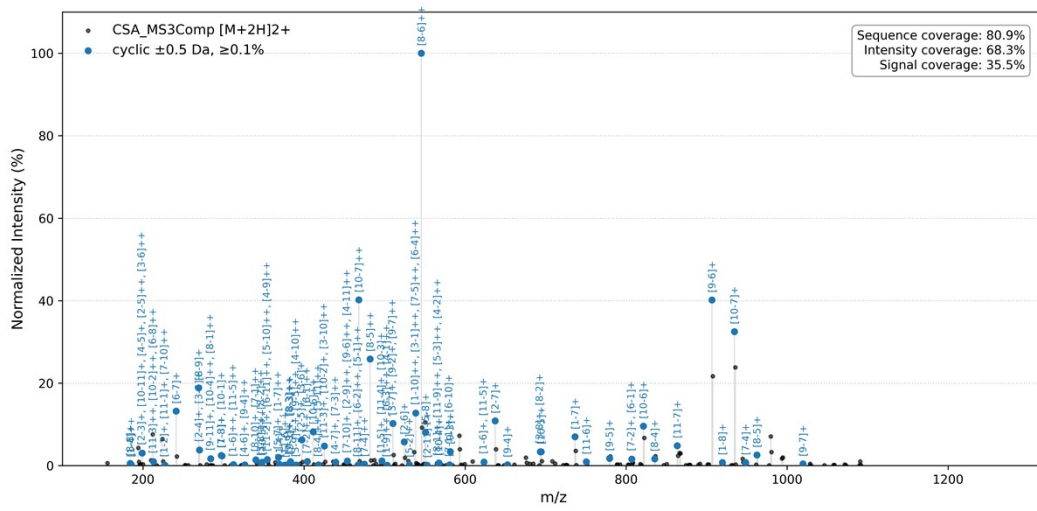

Figure S4-12: MS<sup>3</sup> data assigned CSA

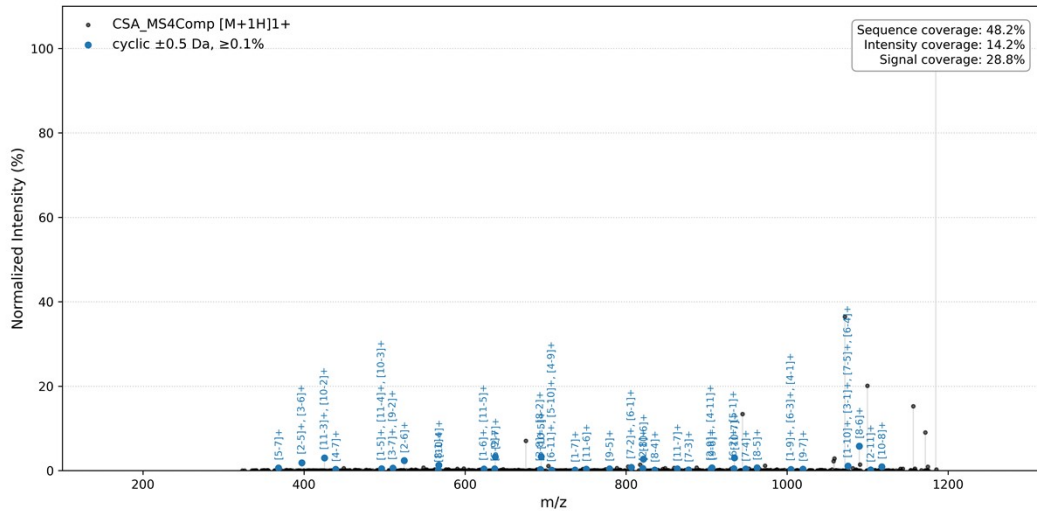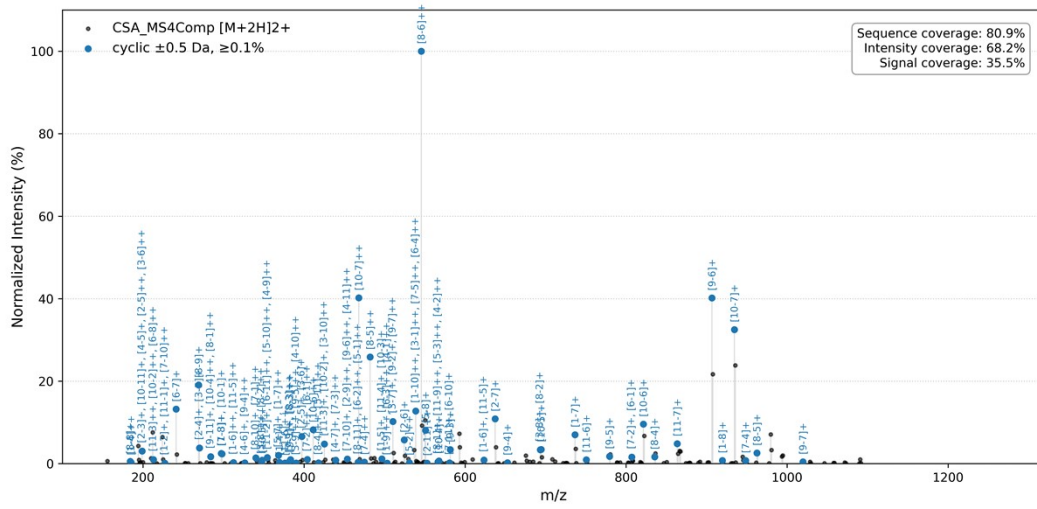

Figure S4-13: MS<sup>4</sup> data assigned CSA

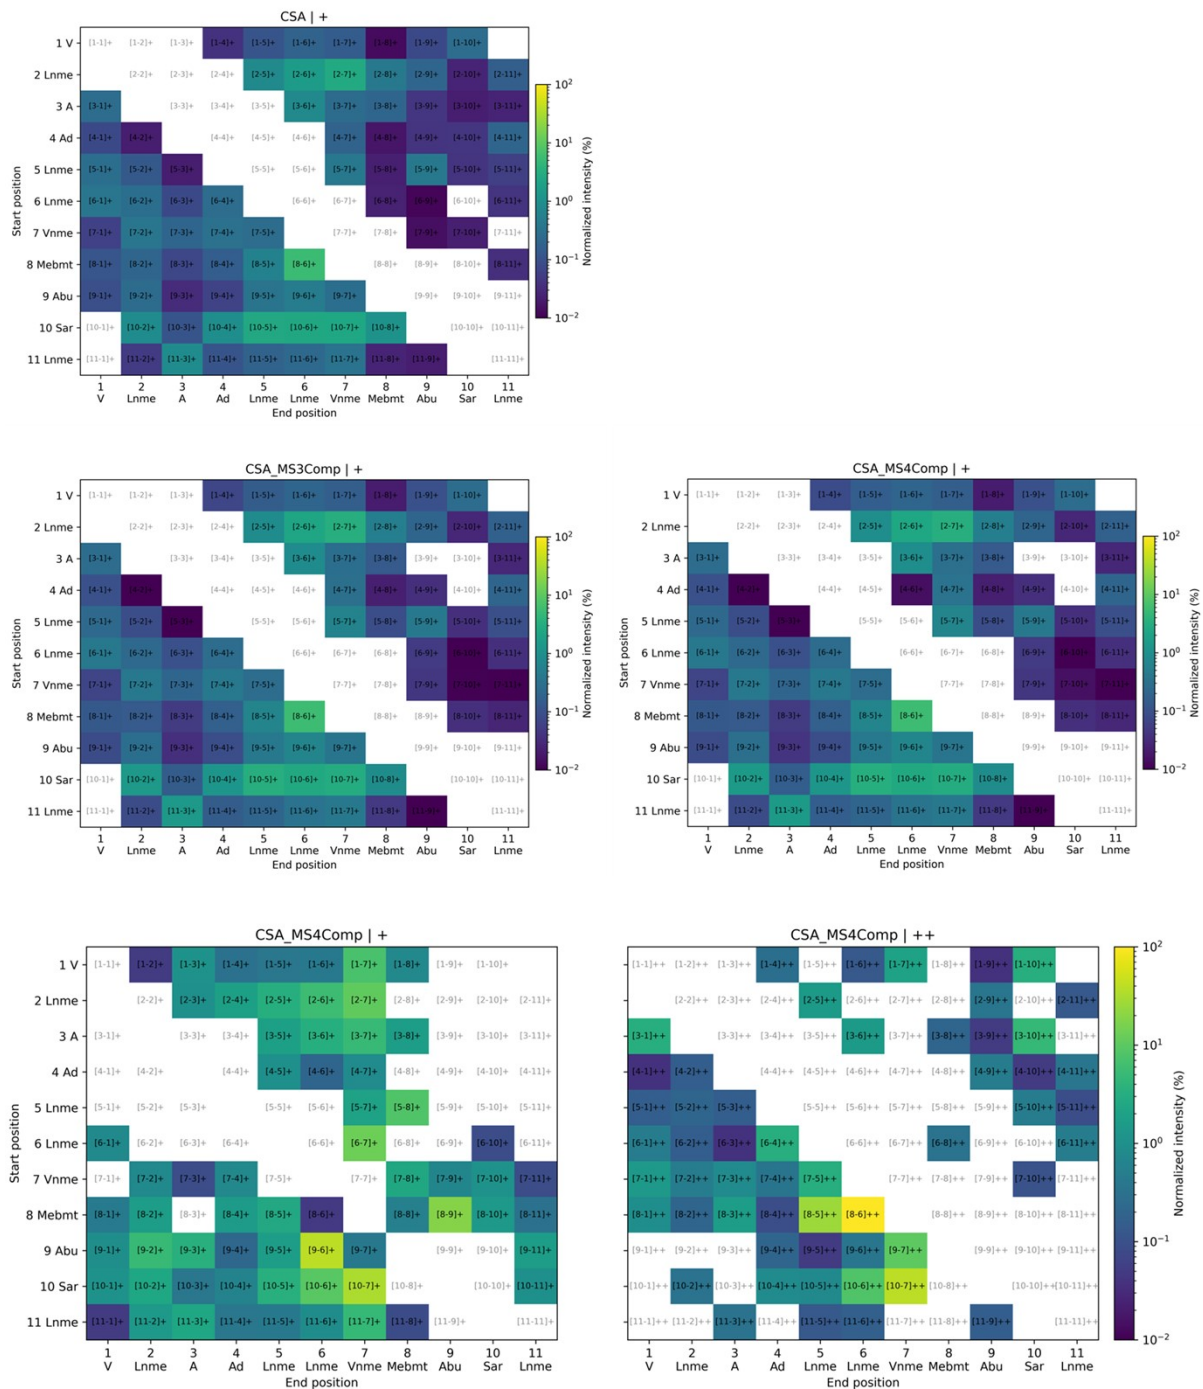

Figure S4-14: Additional data of MS<sup>n</sup> analysis of CSA

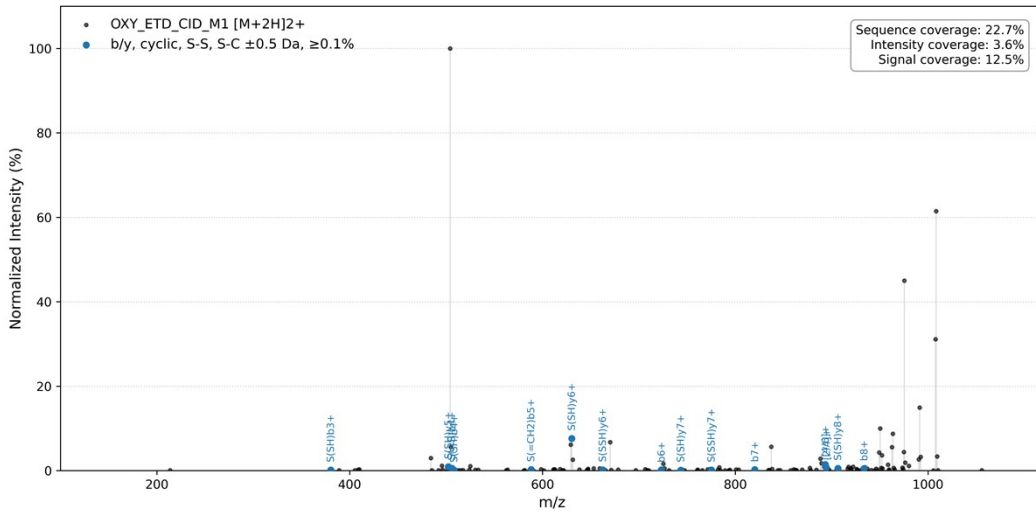

Figure S4-15: ETD-CID data assigned OXY.

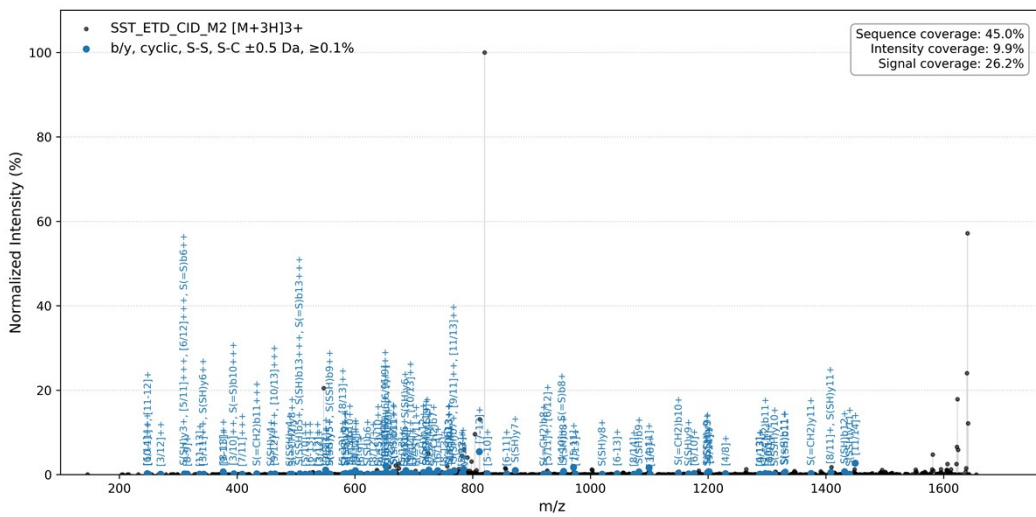

Figure S4-16: ETD-CID data assigned SMT.

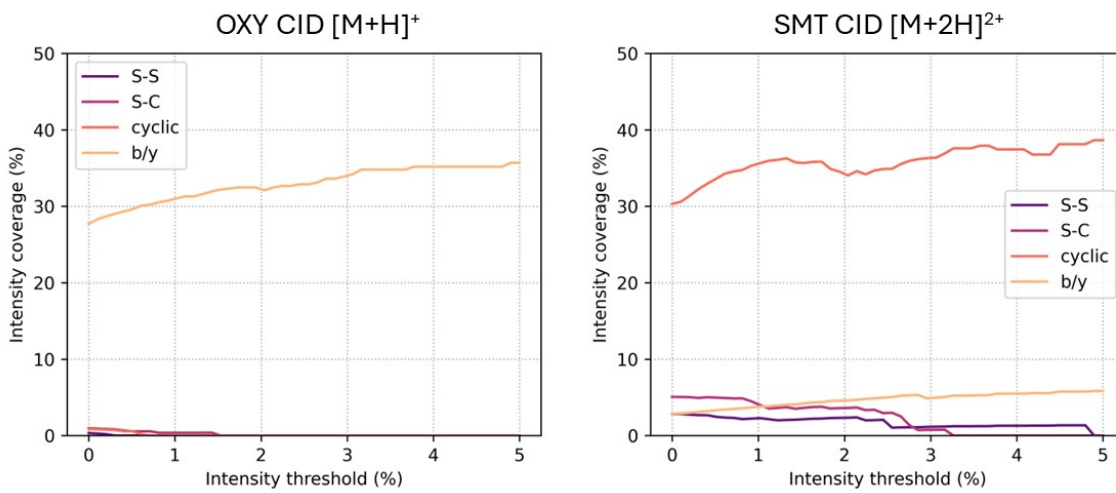

Figure S4-17: Additional charged states for CID fragmentation with intensity coverage by type of fragmentation

## S5 References

- (1) Egelund, P. H. G.; Jadhav, S.; Martin, V.; Johansson Castro, H.; Richner, F.; Le Quement, S. T.; Dettner, F.; Lechner, C.; Schoenleber, R.; Sejer Pedersen, D. Fmoc-Removal with Pyrrolidine Expands the Available Solvent Space in Green Solid-Phase Peptide Synthesis. *ACS Sustainable Chemistry & Engineering* **2021**, *9* (42), 14202–14215.
- (2) Hood, C. A.; Fuentes, G.; Patel, H.; Page, K.; Menakuru, M.; Park, J. H. Fast conventional Fmoc solid-phase peptide synthesis with HCTU. *J Pept Sci* **2008**, *14* (1), 97–101.
- (3) Bacsa, B.; Horváti, K.; Bősze, S.; Andrae, F.; Kappe, C. O. Solid-Phase Synthesis of Difficult Peptide Sequences at Elevated Temperatures: A Critical Comparison of Microwave and Conventional Heating Technologies. *The Journal of Organic Chemistry* **2008**, *73* (19), 7532–7542.
